# Supplementary material for: Synthesis of chiral cyclic amines via Ir-catalyzed enantioselective hydrogenation of cyclic imines
Source: Royal Society of Chemistry journal article supplement (doi:10.1039/c7ob00442g), 2017-01-01
Supplement: c7ob00442g1.pdf [file c7ob00442g1.pdf]

*Supplementary Information for:*

**Synthesis of Chiral Cyclic amines *via* Ir-Catalyzed Enantioselective  
Hydrogenation of Cyclic Imines**

Ying Zhang, Duanyang Kong, Rui Wang, and Guohua Hou\*

Key Laboratory of Radiopharmaceuticals, College of Chemistry, Beijing Normal University,

Beijing 100875, China.

E-mail: ghhou@bnu.edu.cn

**Contents:**

|                                 |        |
|---------------------------------|--------|
| 1. NMR spectra of products..... | S2-21  |
| 2. GC and HPLC spectra.....     | S22-41 |

## 1. NMR spectra of products

### Compound 2a

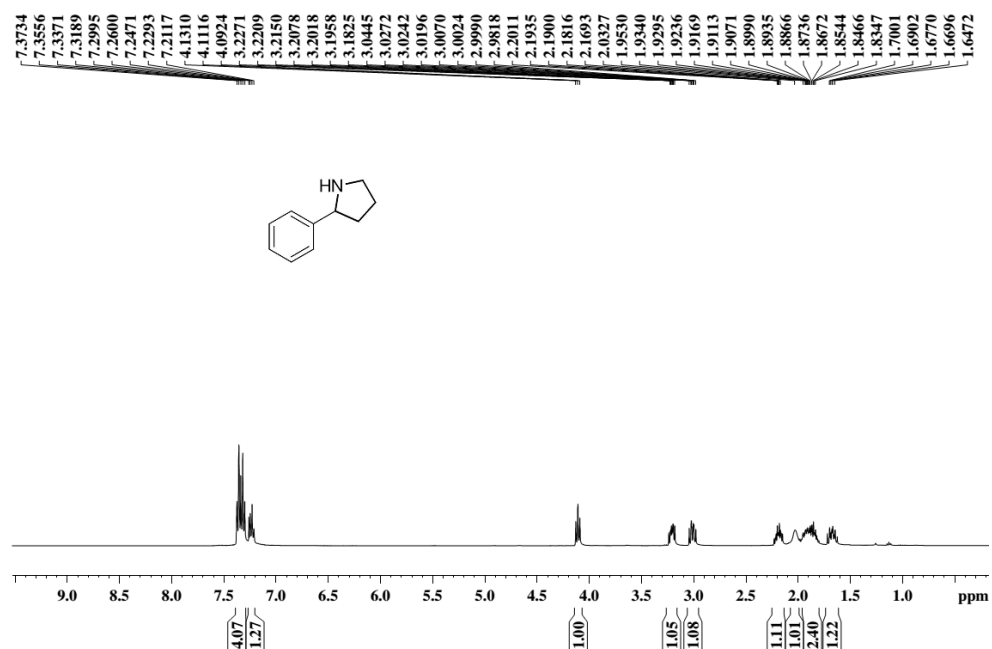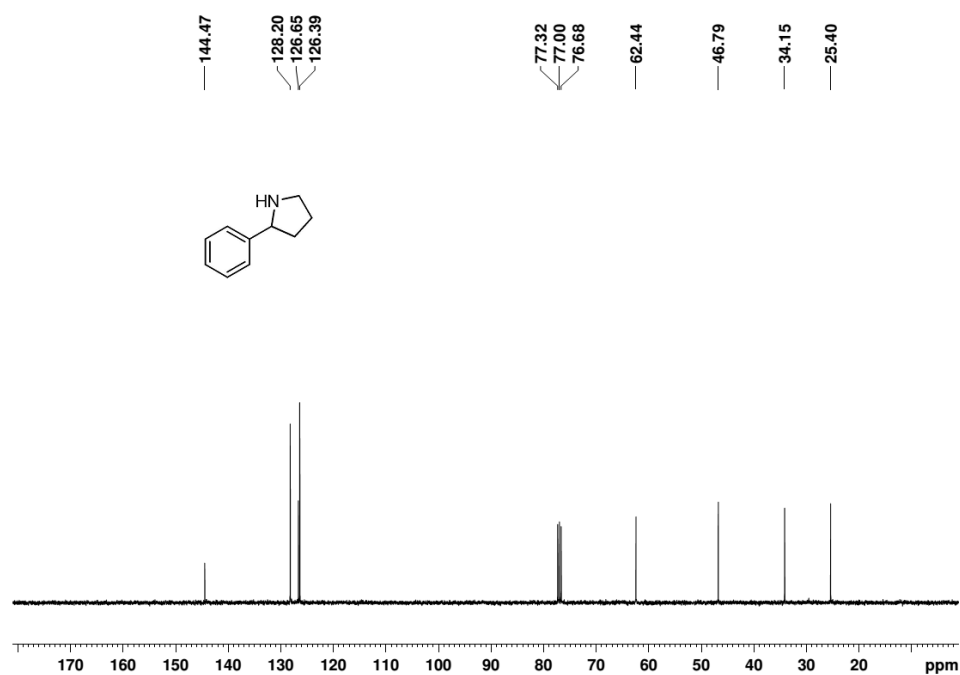

# Compound 2b

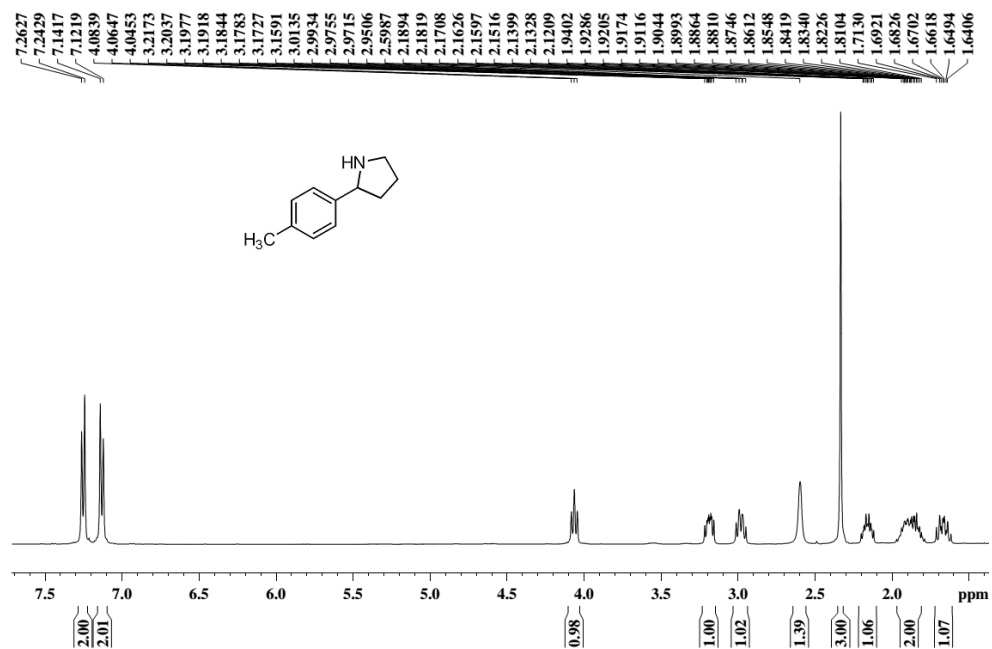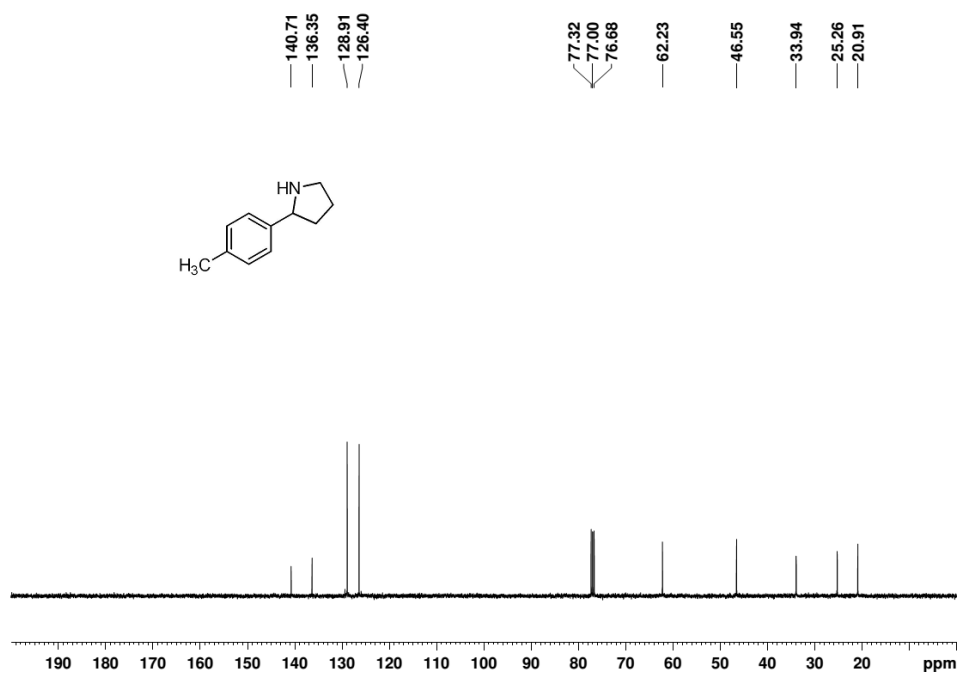

# Compound 2c

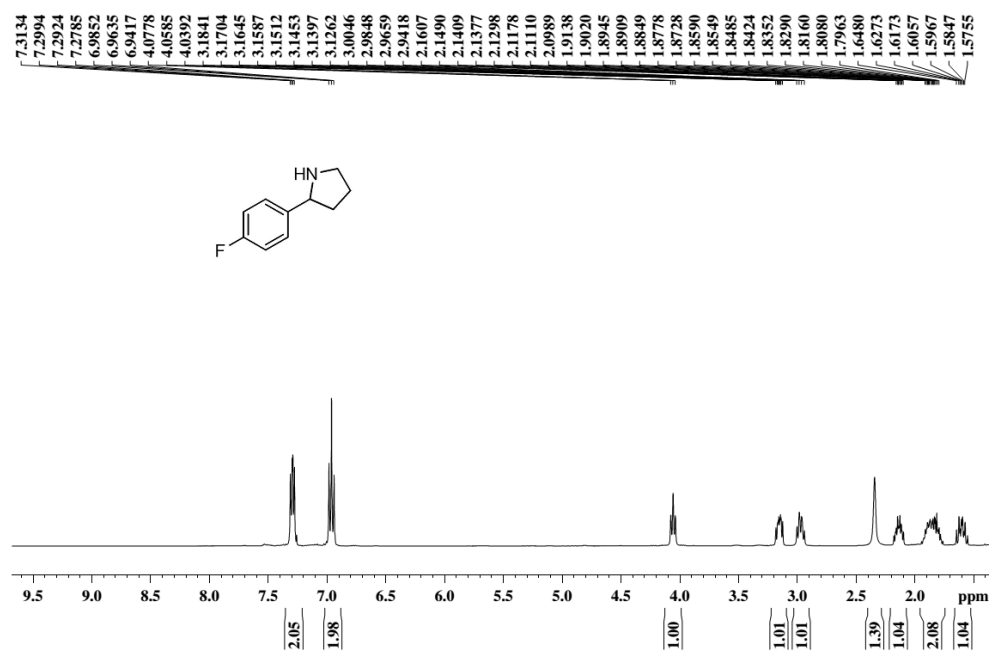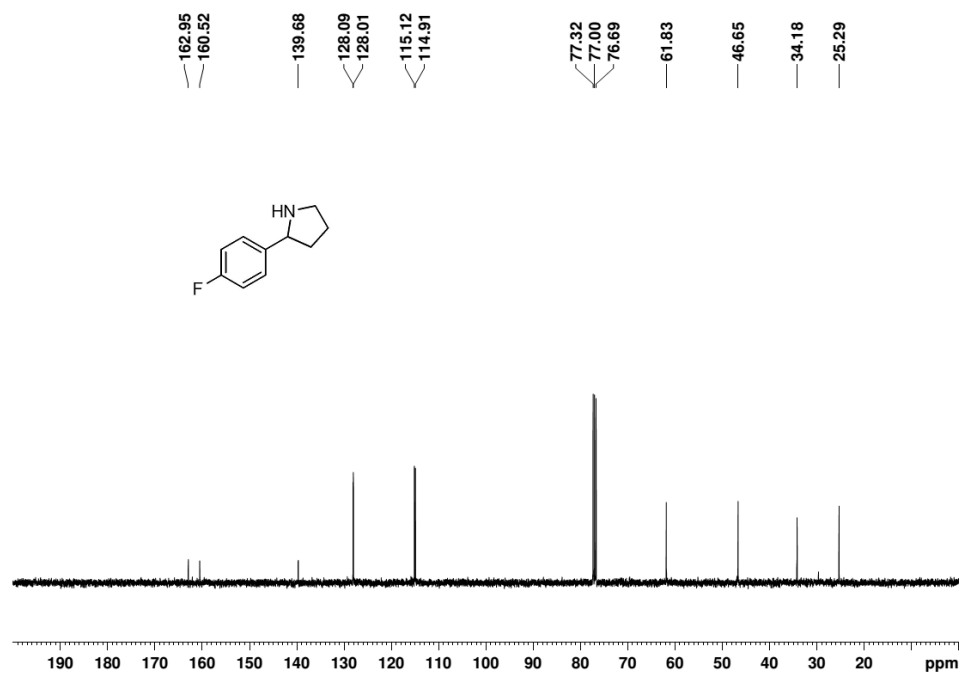

# Compound 2d

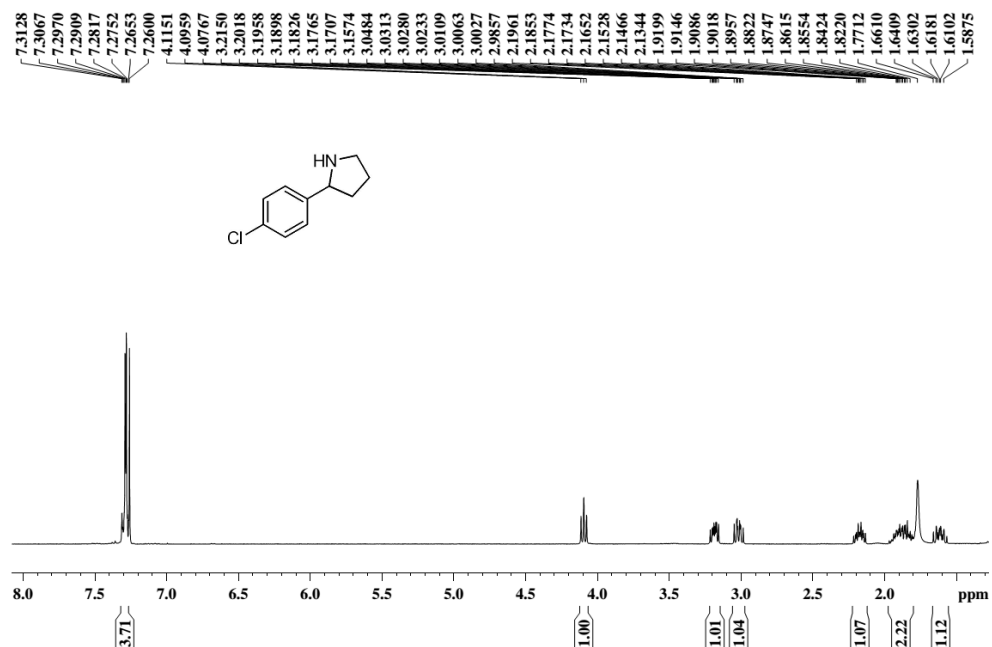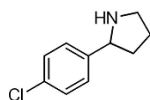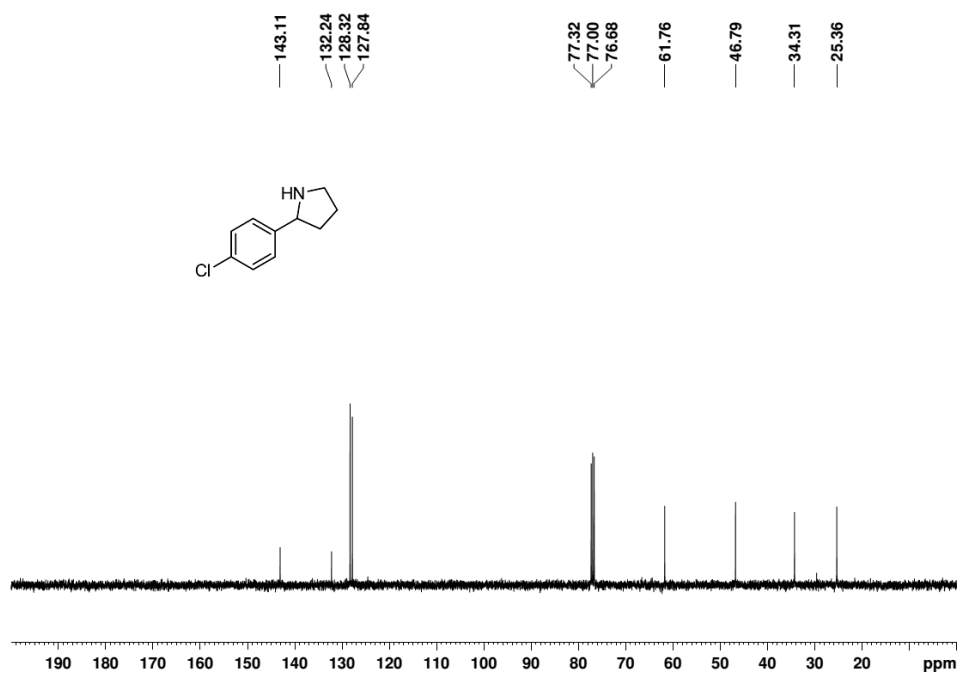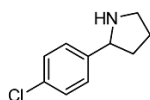

# Compound 2e

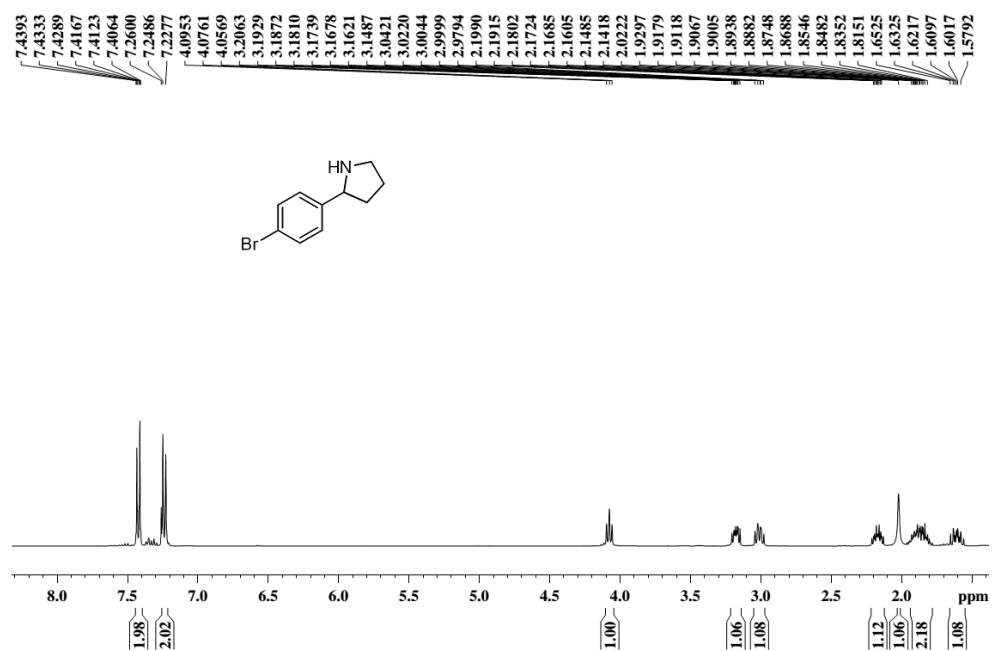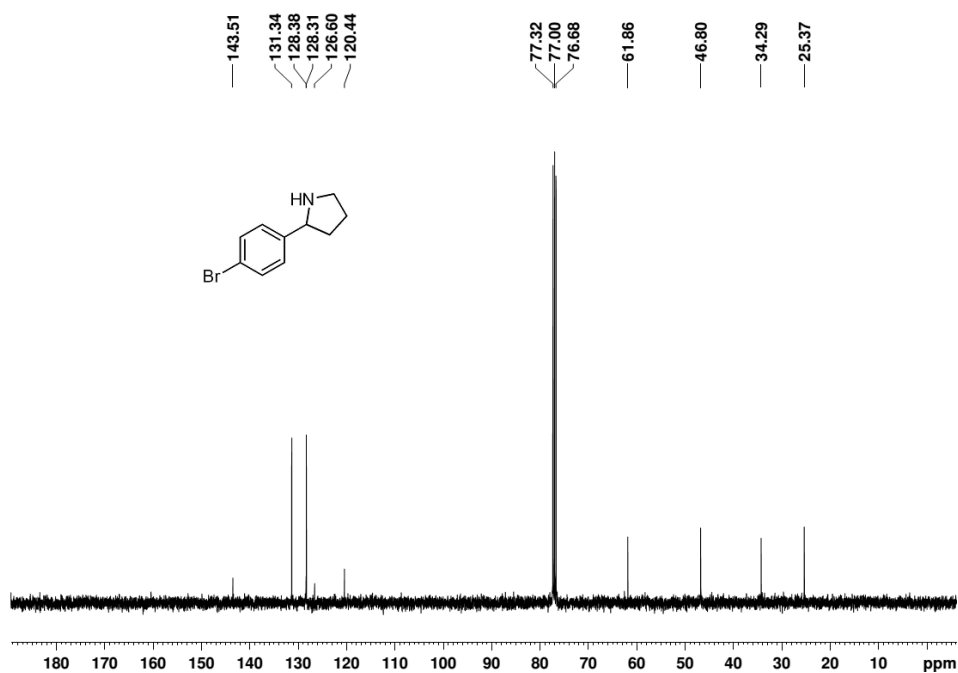

# Compound 2f

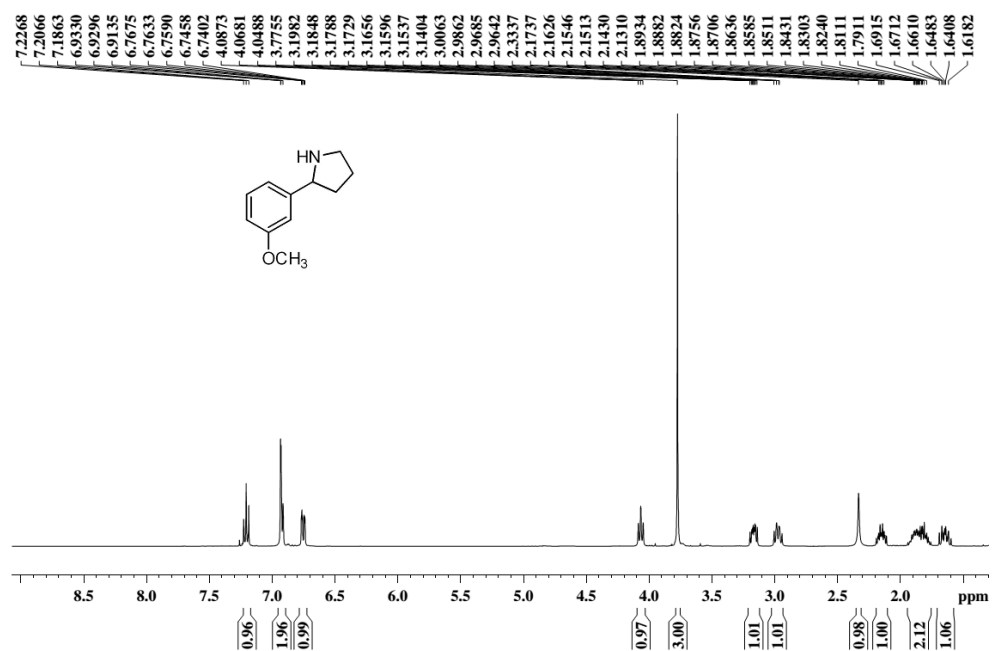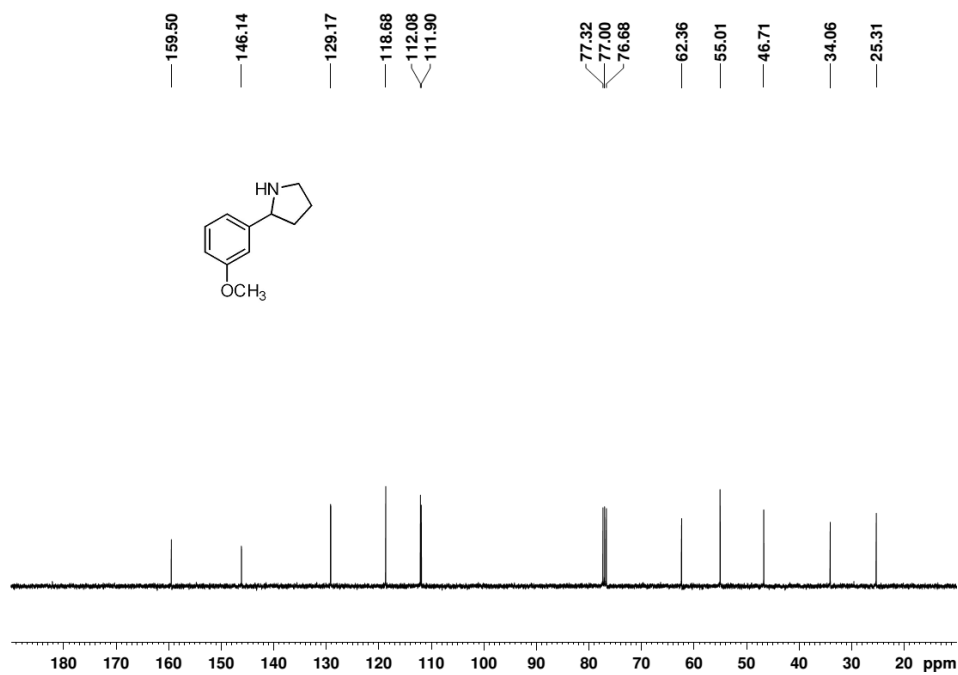

# Compound 2g

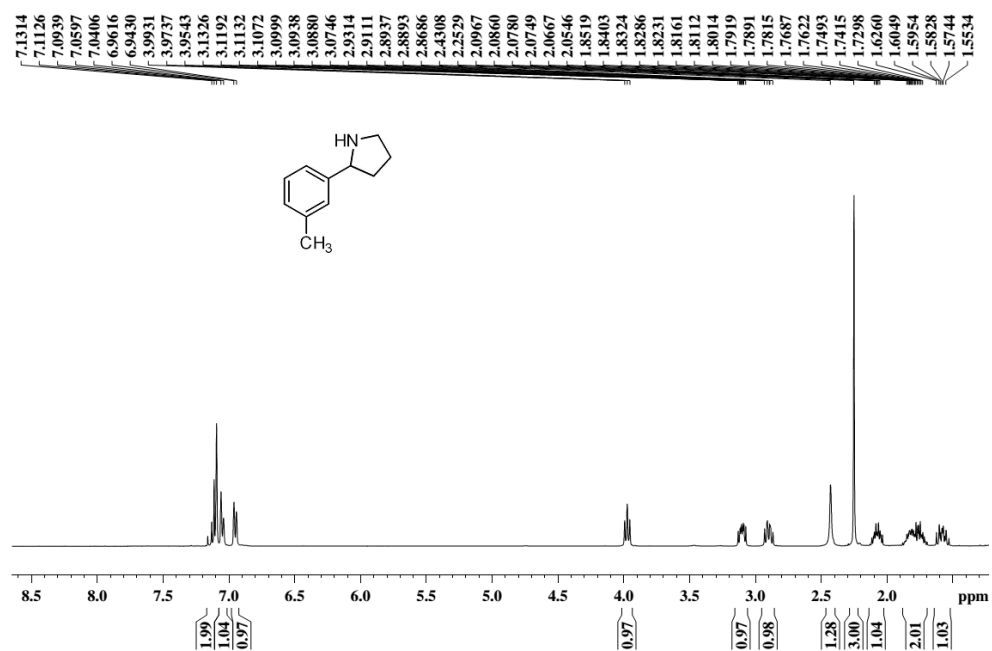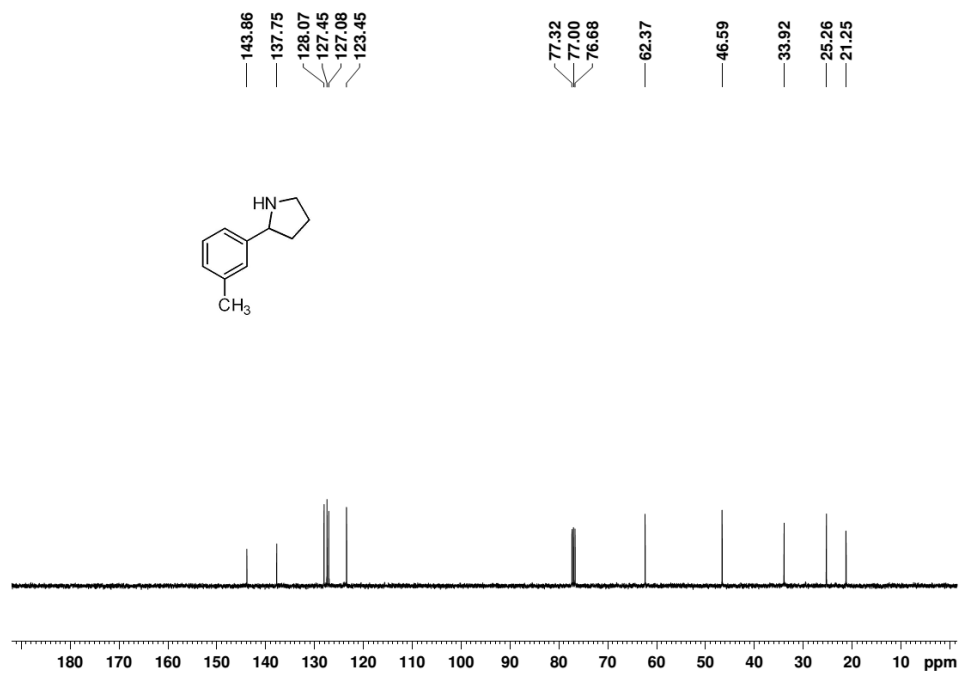



# Compound 2h

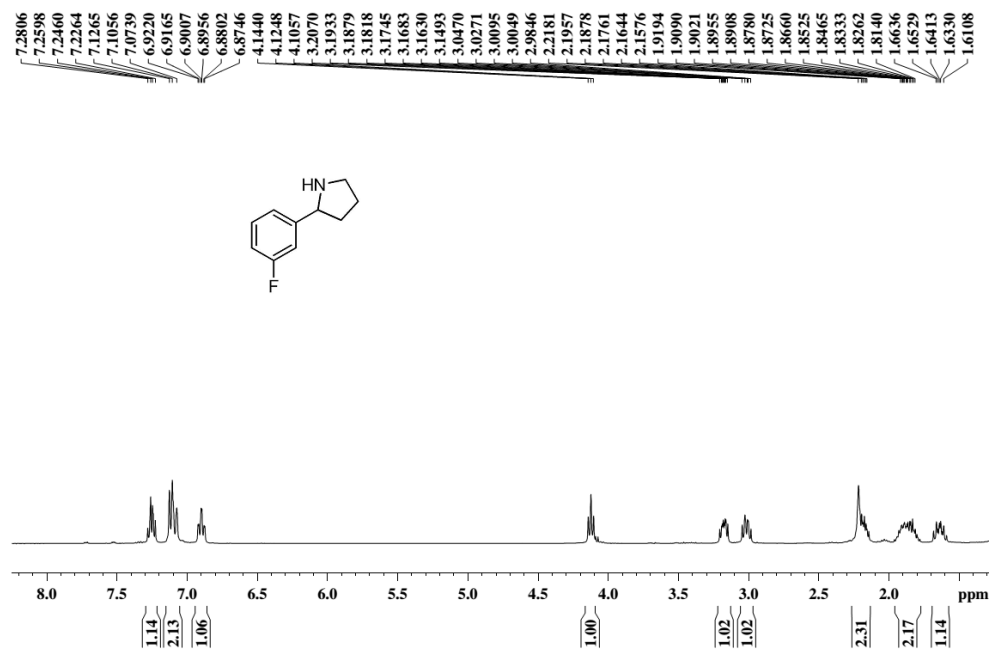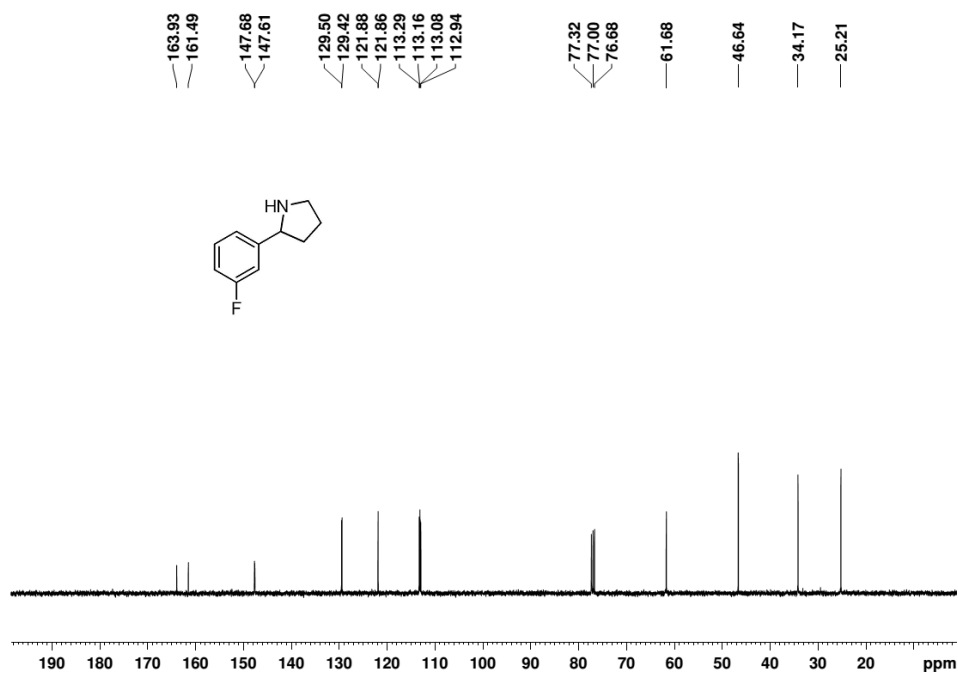

# Compound 2i

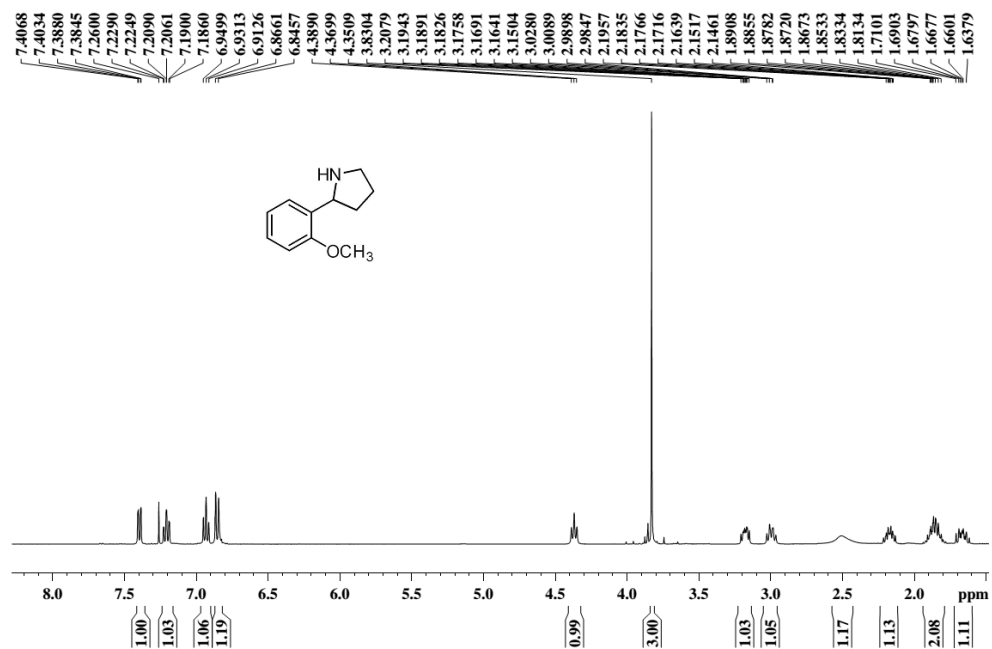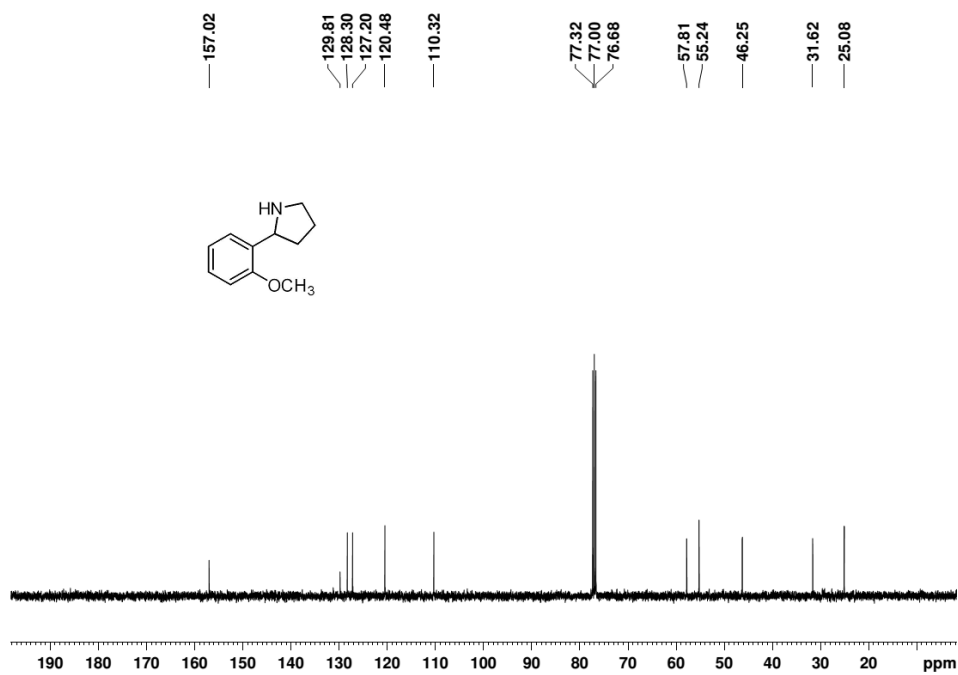

# Compound 2j

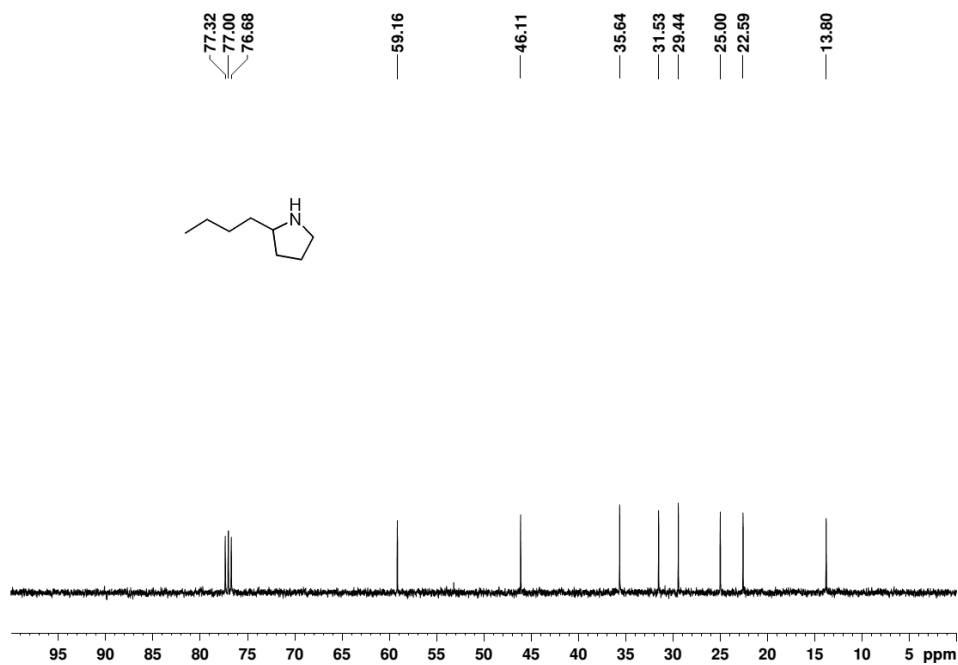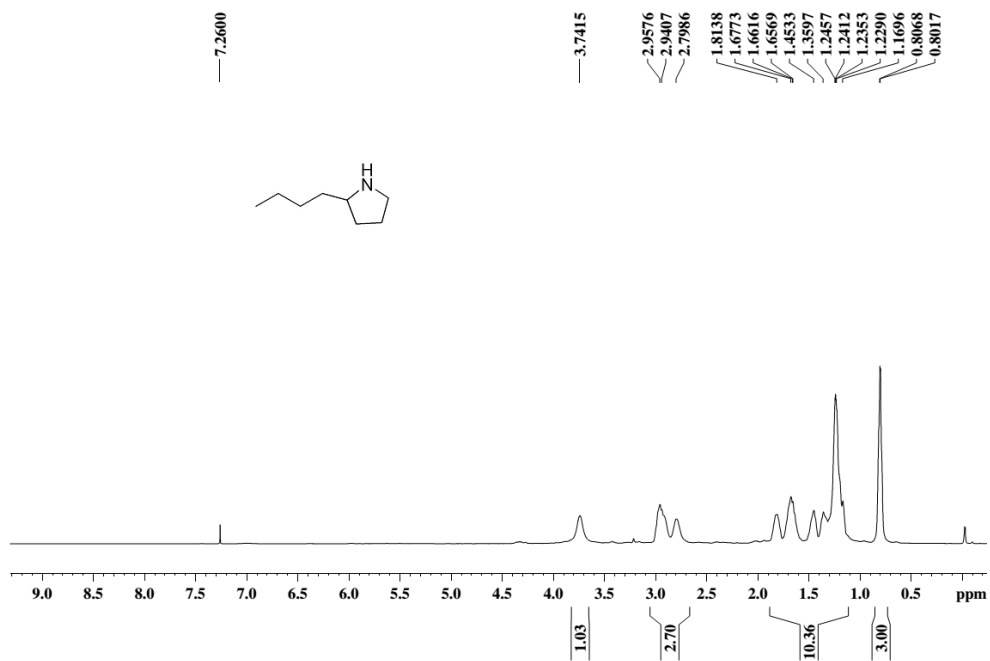

# Compound 2k

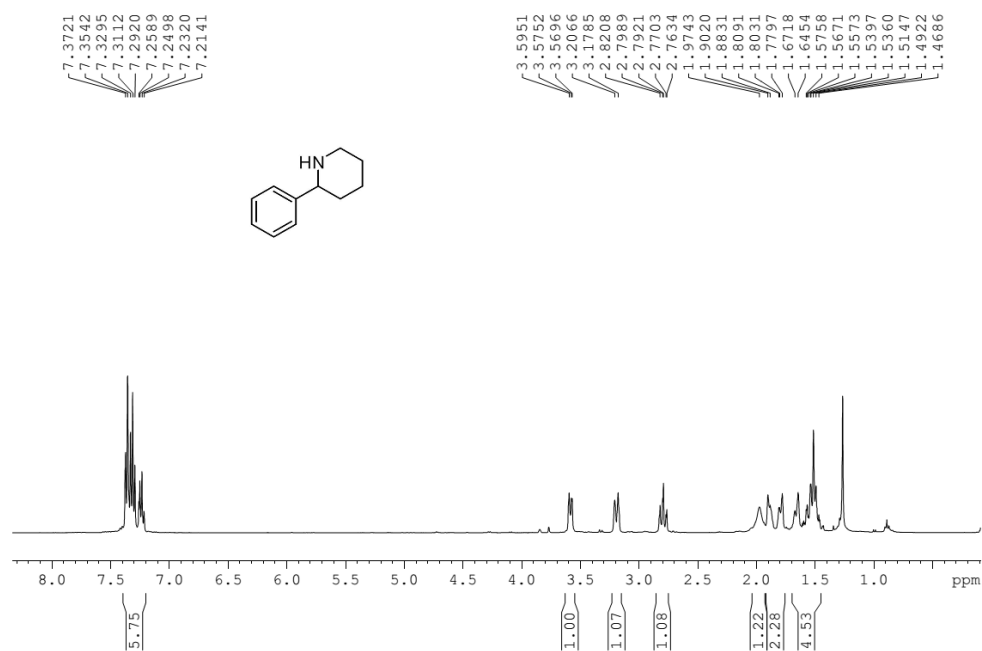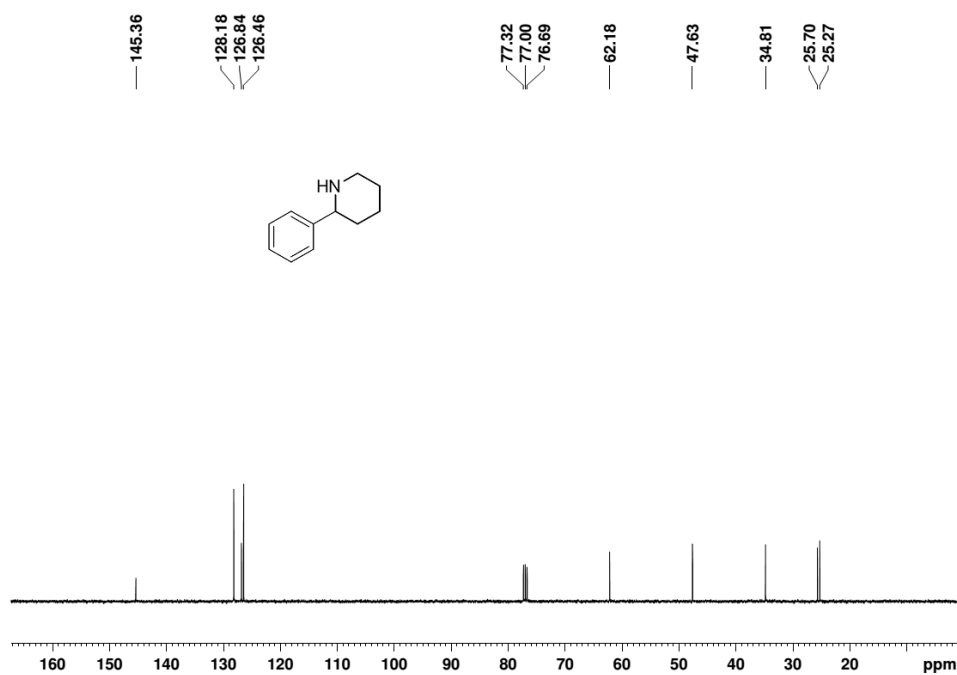

# Compound 2l

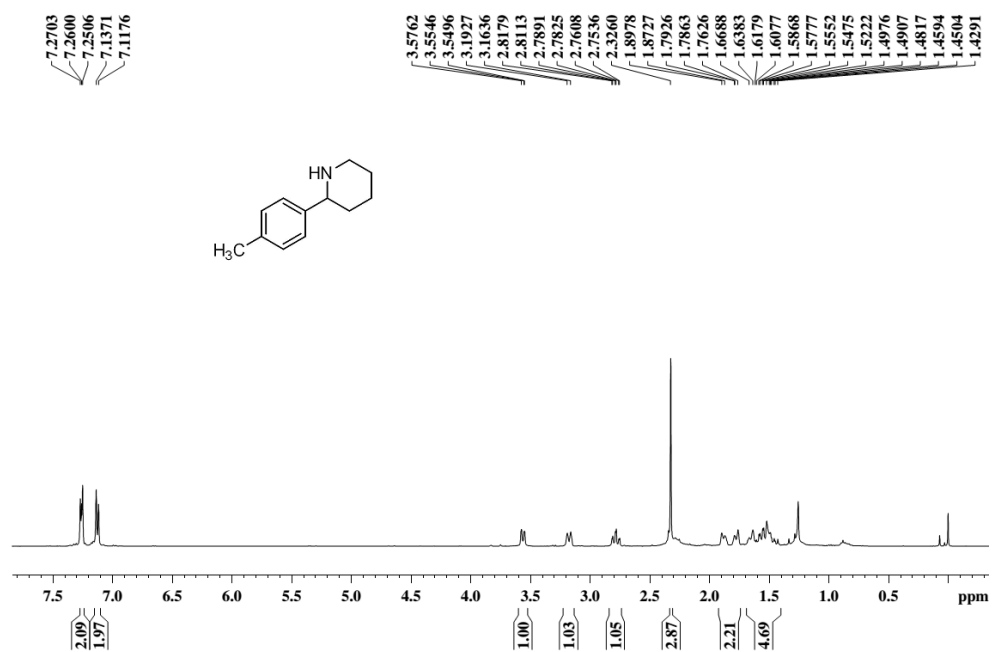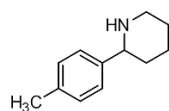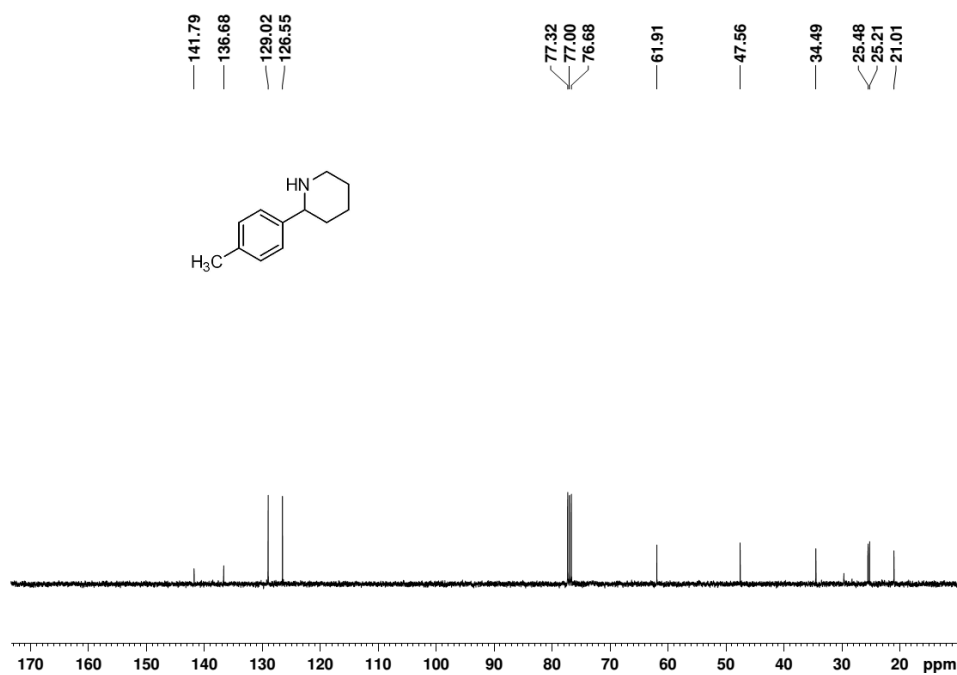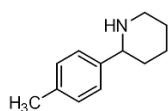

# Compound 2m

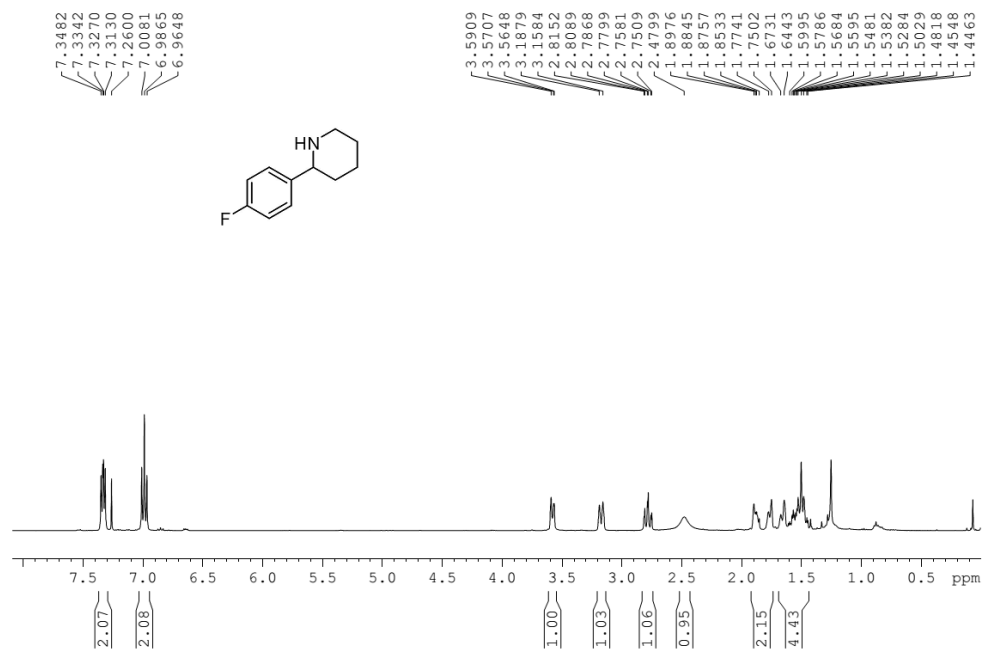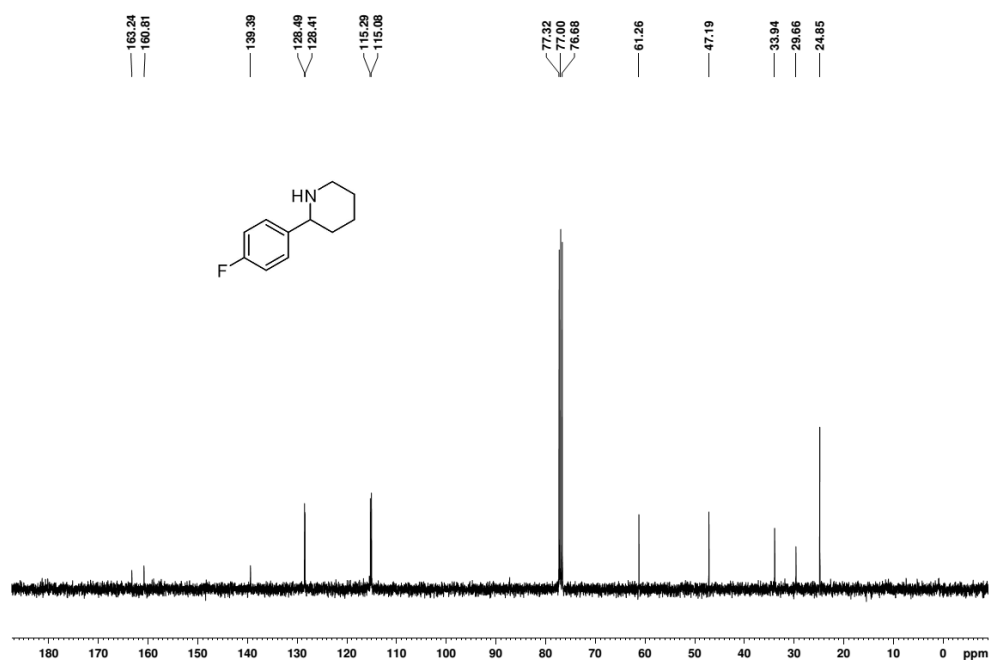

# Compound 2n

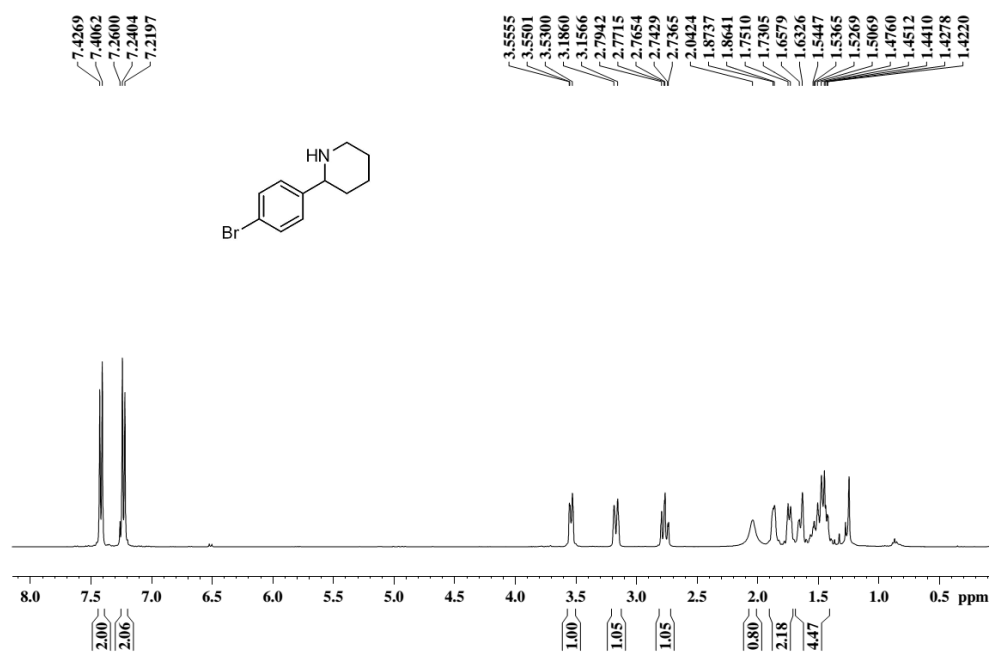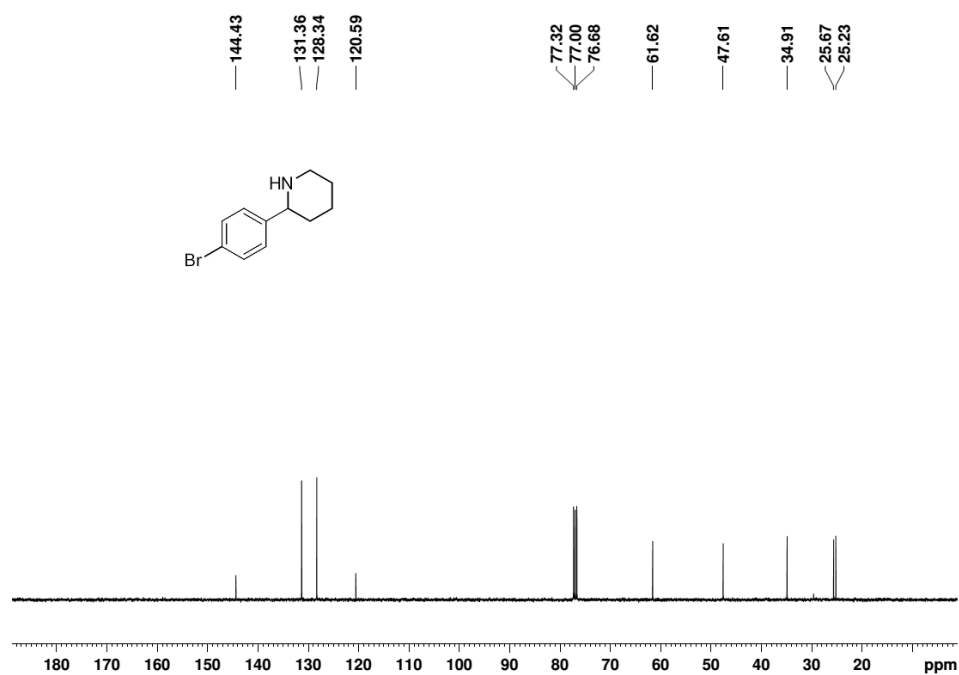

# Compound 2o

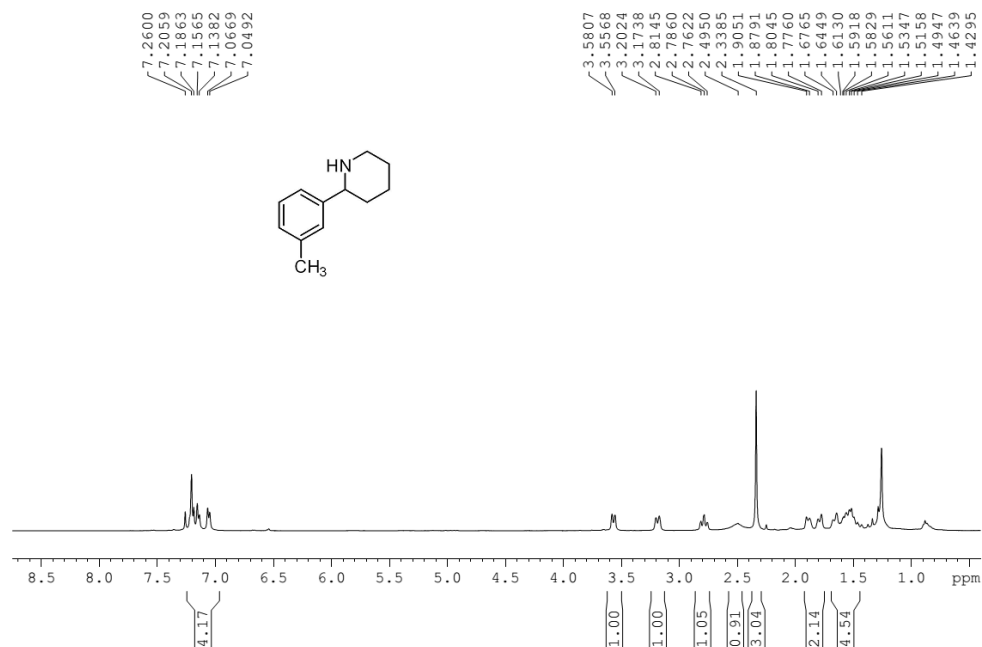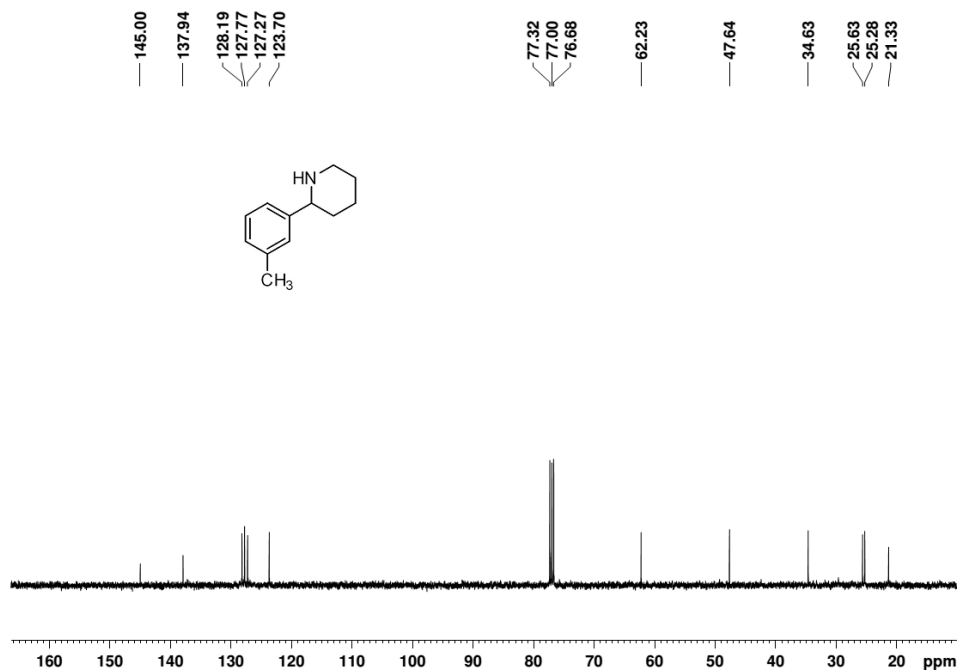



# Compound 2p

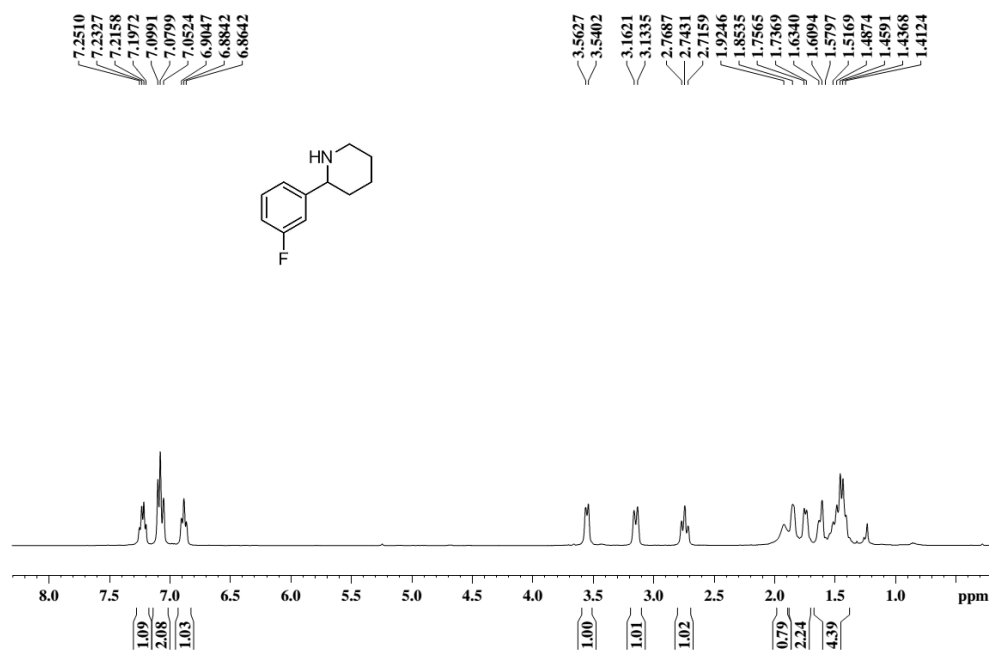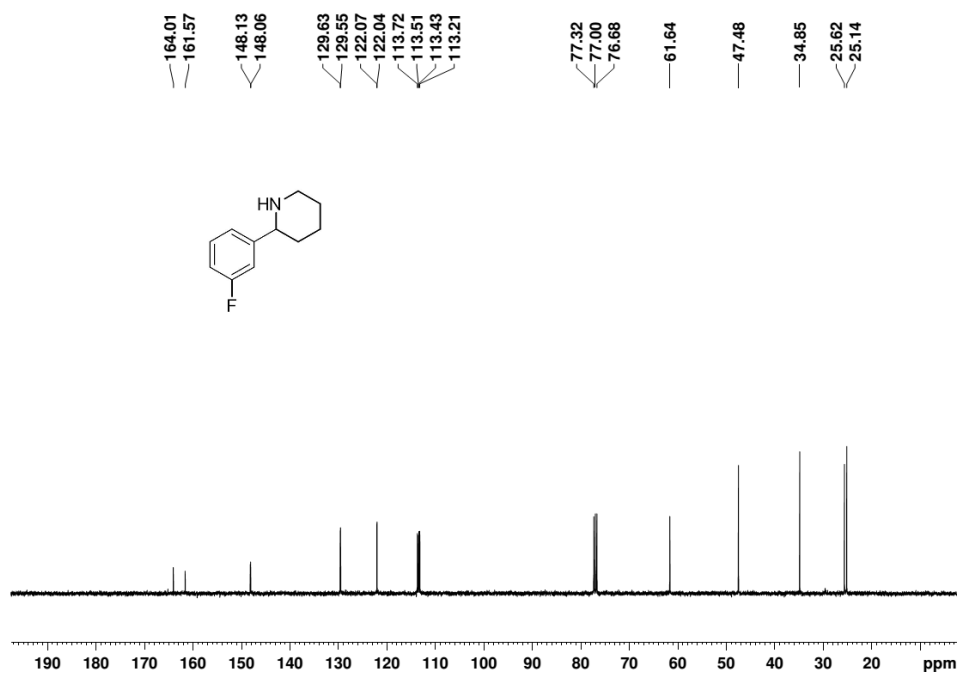

# Compound 2q

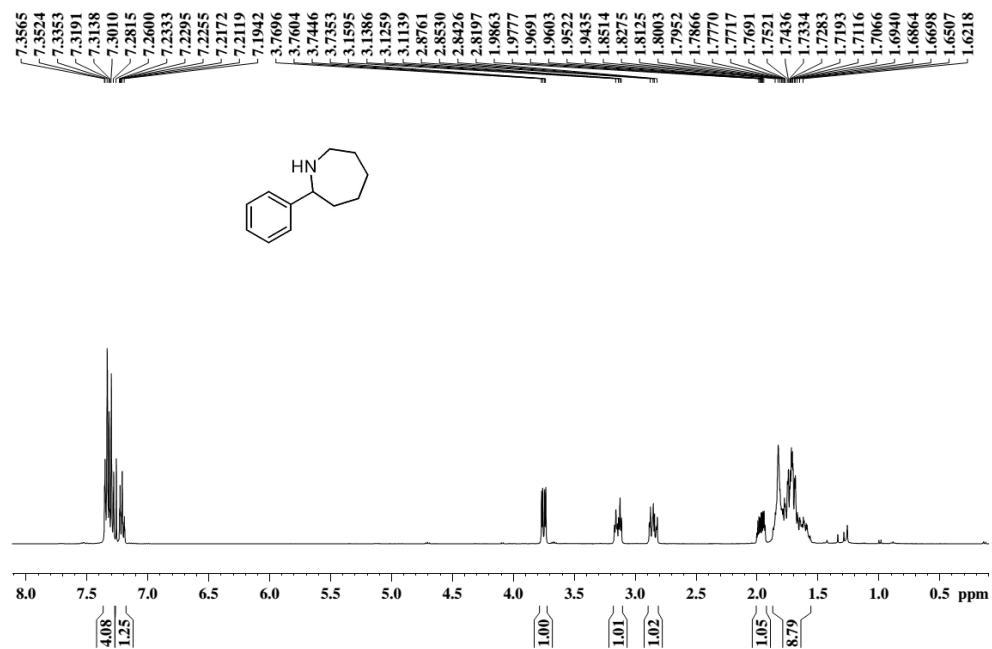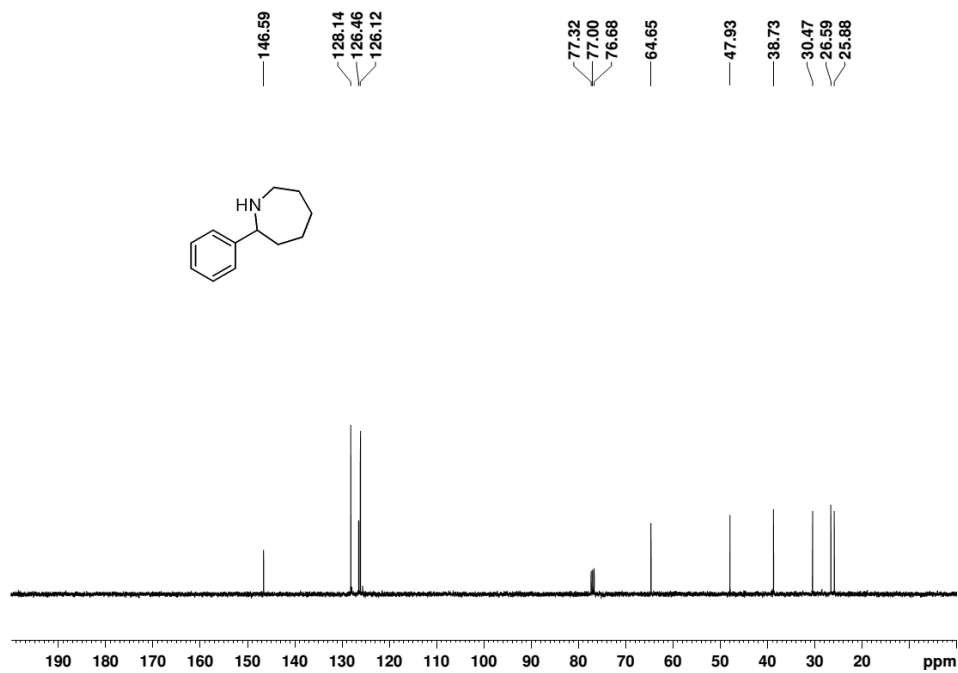

# Compound 2r

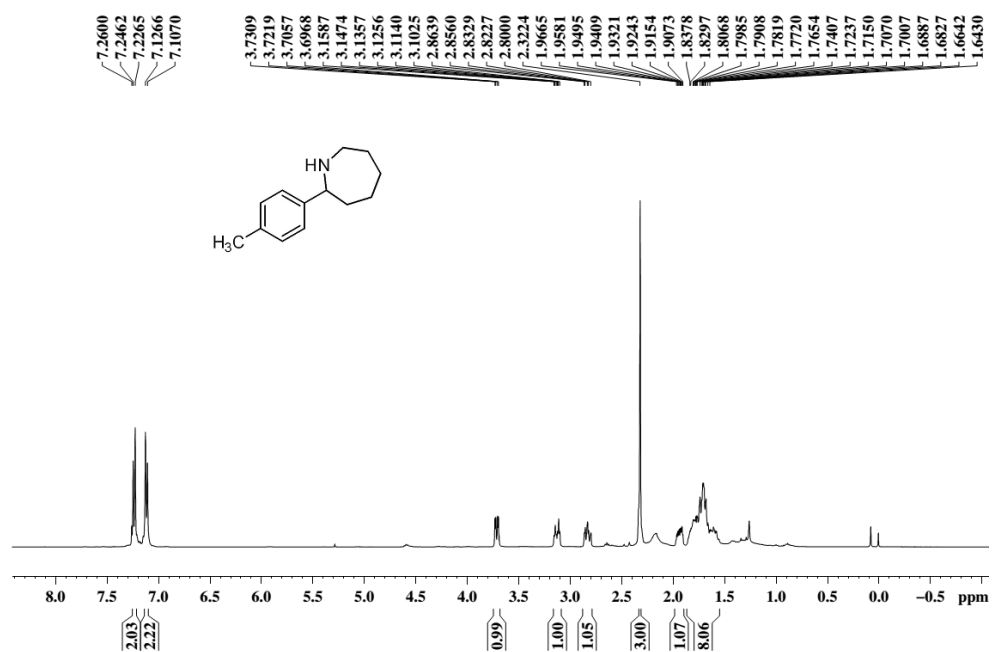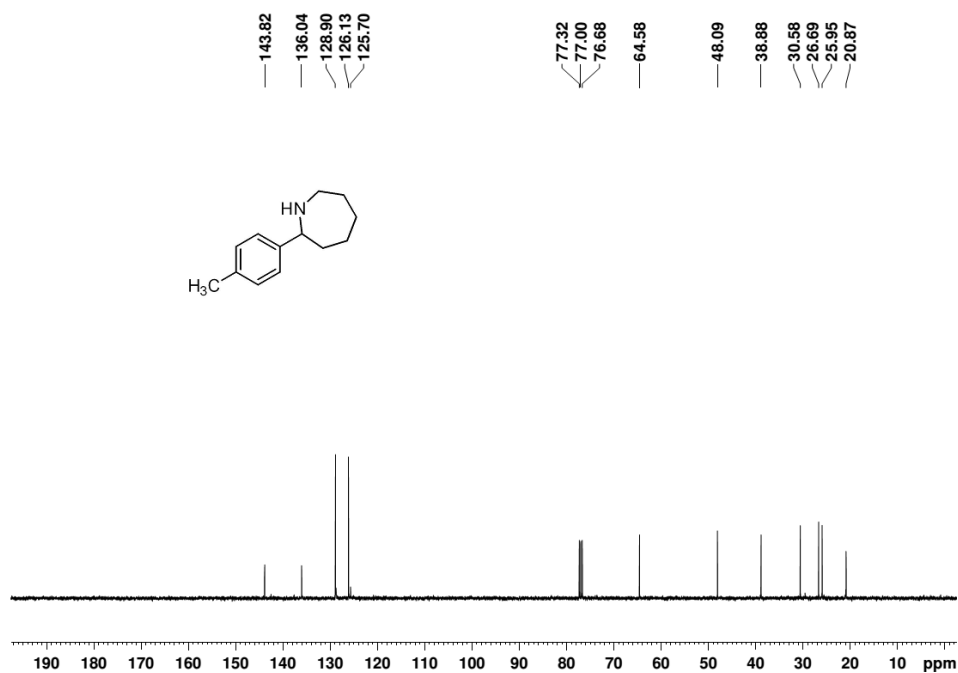

# Compound 2s

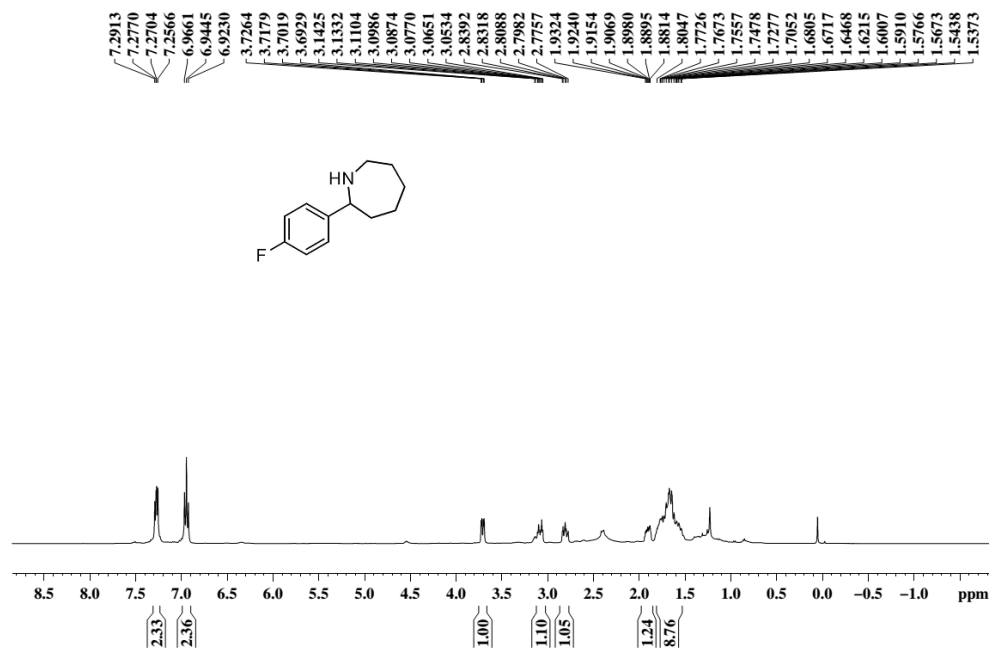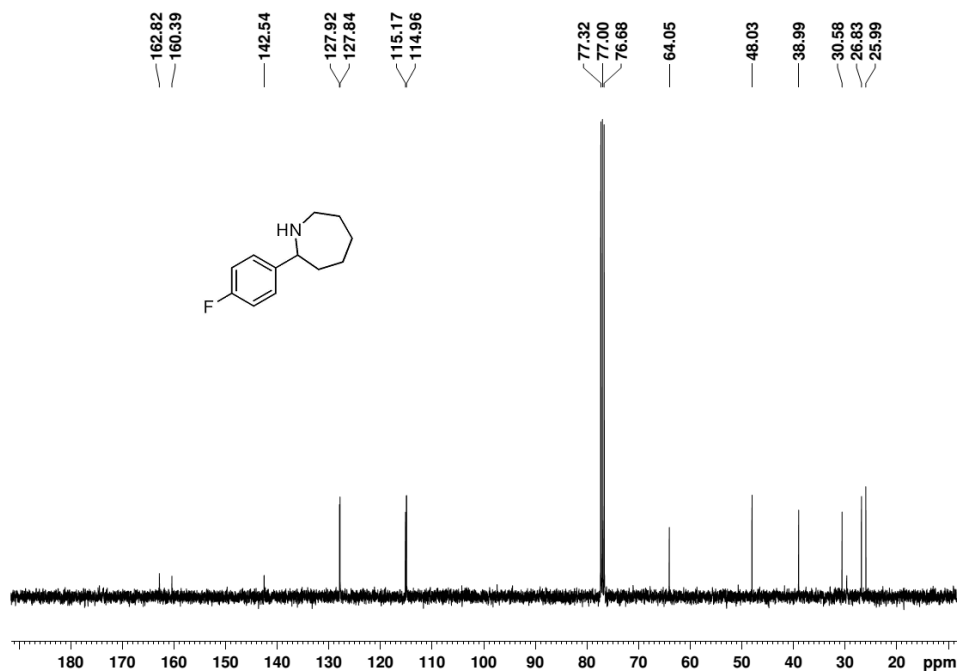

**(+)-(6S,10bR)-McN-4612-Z**

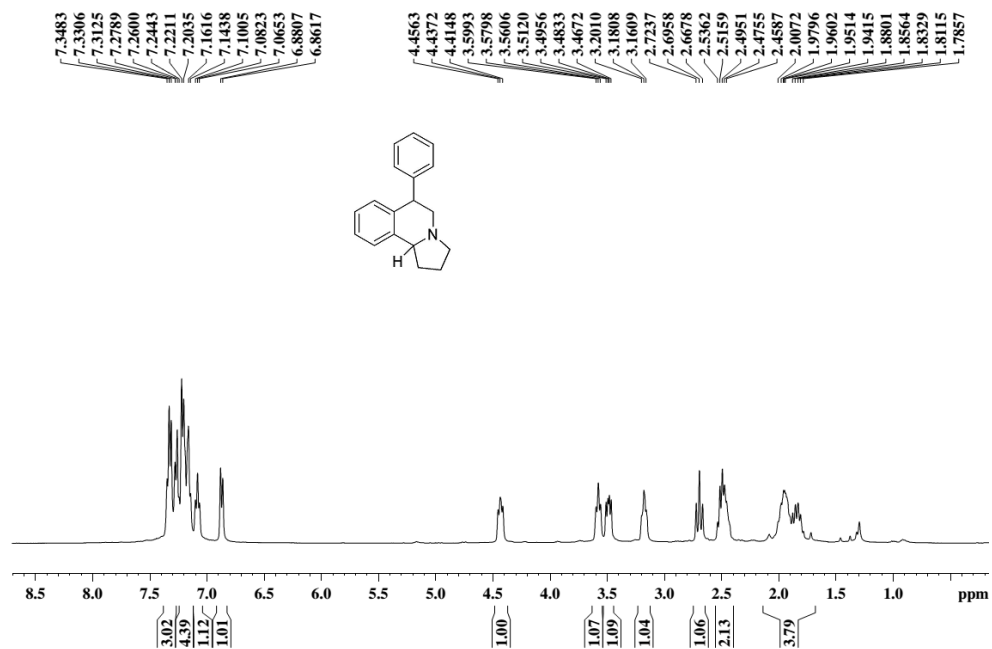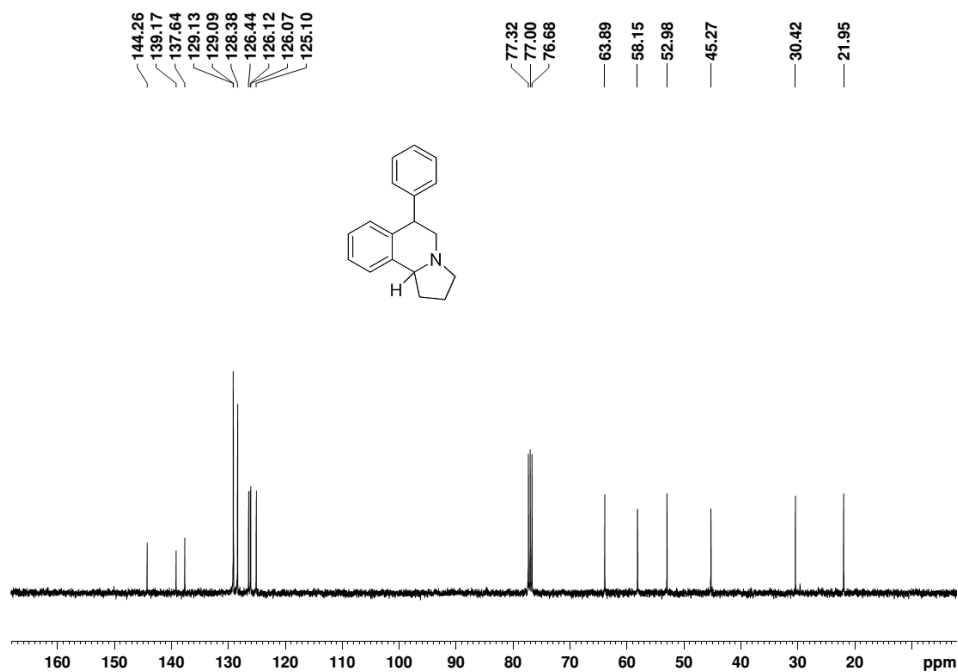

## 2. GC and HPLC spectra

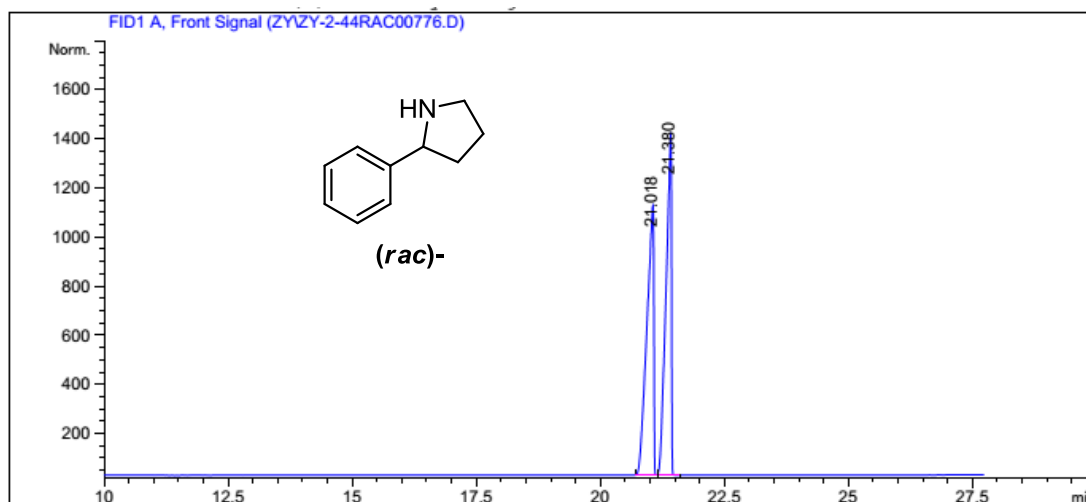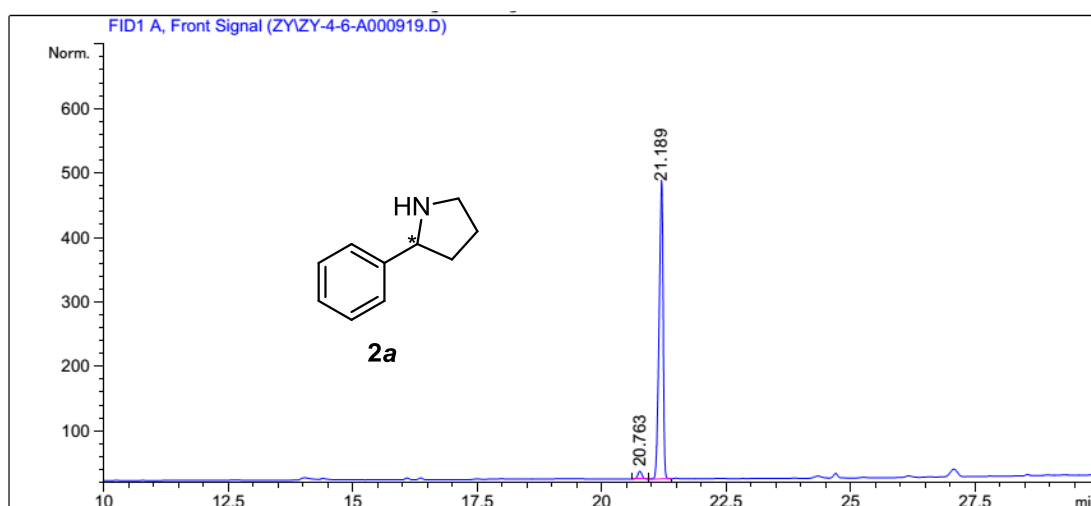

| Peak # | RetTime [min] | Type | Width [min] | Area [pA*s] | Height [pA] | Area %   |
|--------|---------------|------|-------------|-------------|-------------|----------|
| 1      | 20.763        | BV   | 0.0997      | 69.21050    | 11.92563    | 2.57930  |
| 2      | 21.189        | VB   | 0.0990      | 2614.09985  | 455.23560   | 97.42070 |

Totals : 2683.31036 467.16123

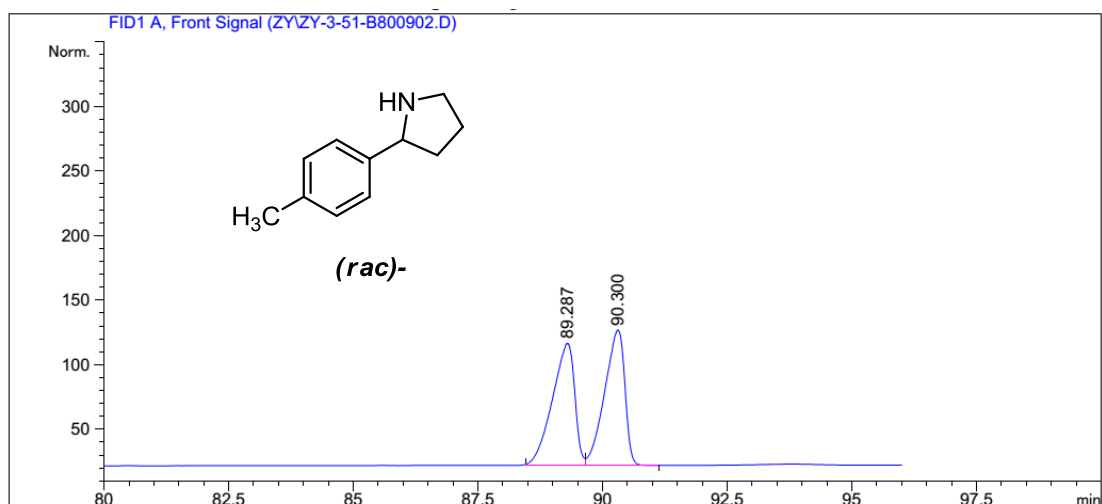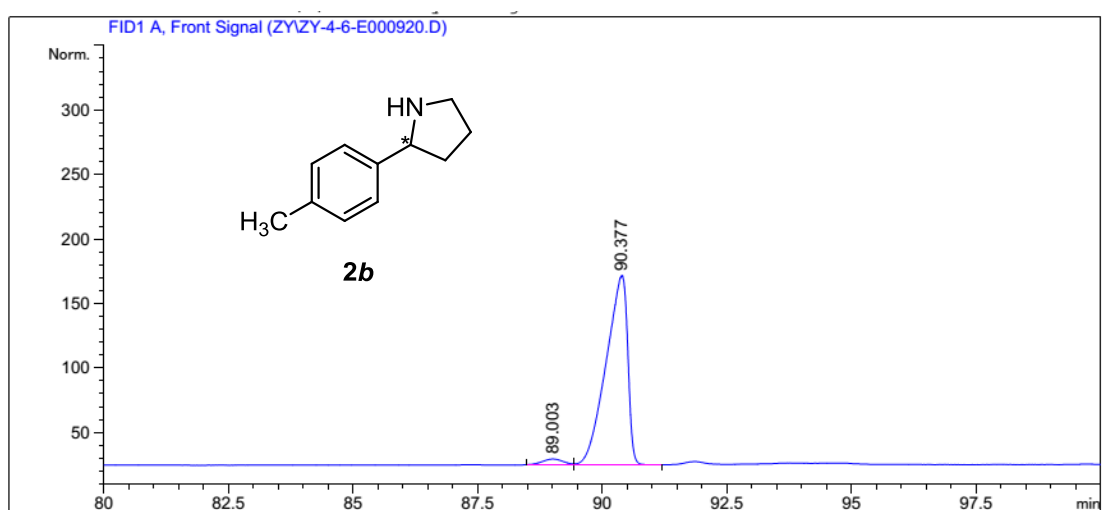

| Peak # | RetTime [min] | Type | Width [min] | Area [pA*s] | Height [pA] | Area %   |
|--------|---------------|------|-------------|-------------|-------------|----------|
| 1      | 89.003        | BV   | 0.4545      | 130.95226   | 4.50221     | 2.87713  |
| 2      | 90.377        | VB   | 0.4616      | 4420.54443  | 146.17757   | 97.12287 |

Totals : 4551.49669 150.67978

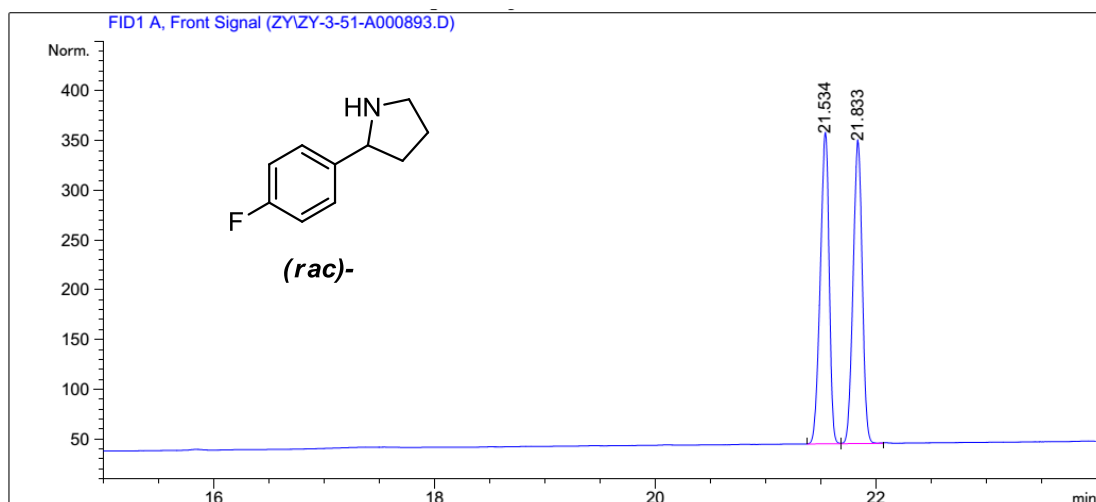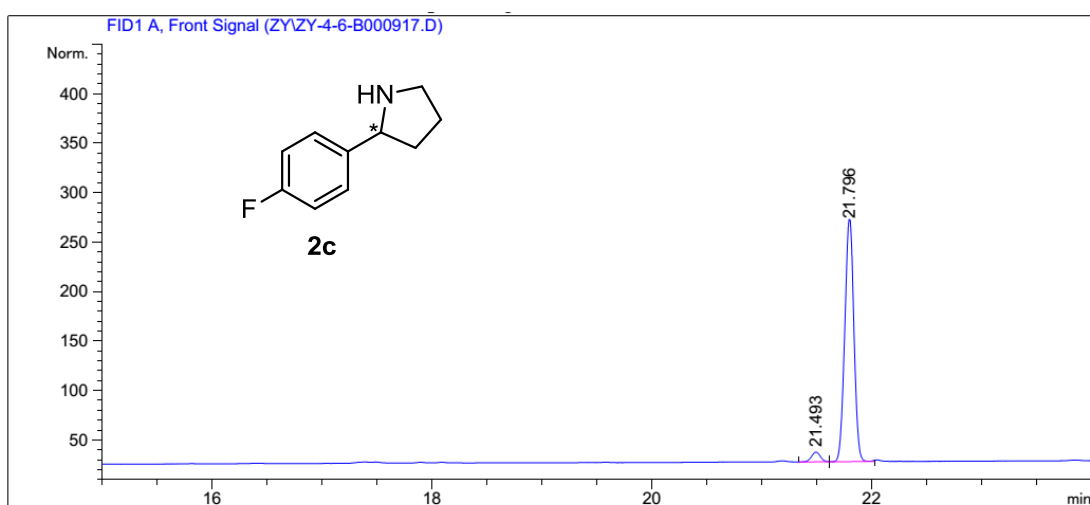

| Peak # | RetTime [min] | Type | Width [min] | Area [pA*s] | Height [pA] | Area %   |
|--------|---------------|------|-------------|-------------|-------------|----------|
| 1      | 21.493        | BV   | 0.0977      | 54.81787    | 9.72887     | 3.74831  |
| 2      | 21.796        | VB   | 0.1003      | 1407.65137  | 240.52477   | 96.25169 |

Totals : 1462.46924 250.25363



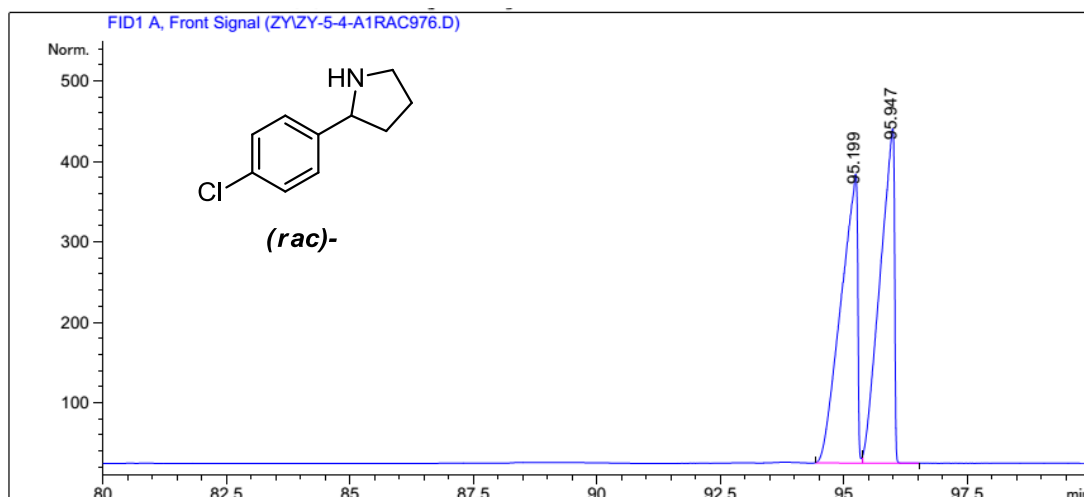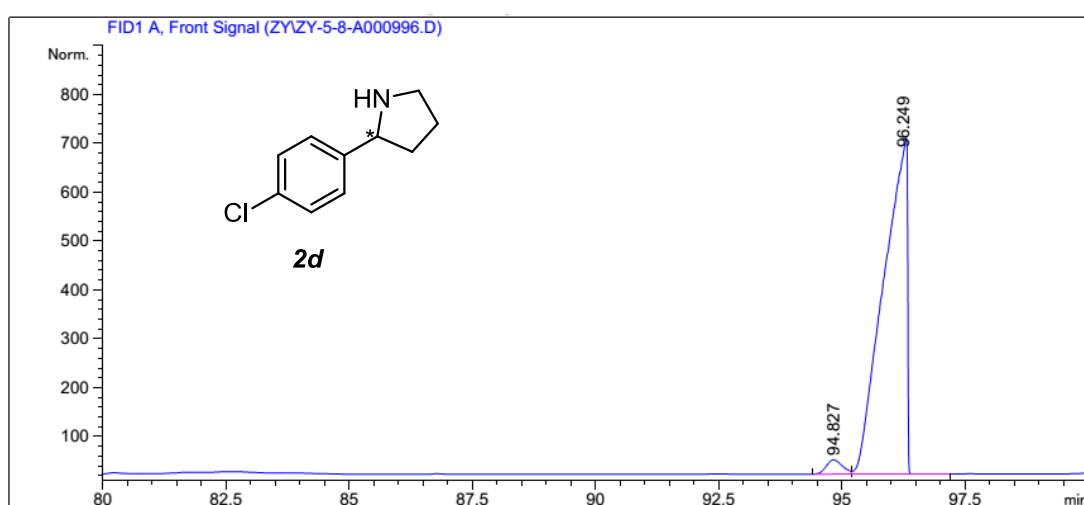

| Peak # | RetTime [min] | Type | Width [min] | Area [pA*s] | Height [pA] | Area %   |
|--------|---------------|------|-------------|-------------|-------------|----------|
| 1      | 94.827        | BV   | 0.3570      | 664.91913   | 29.01025    | 2.82244  |
| 2      | 96.249        | VB   | 0.4444      | 2.28934e4   | 657.84521   | 97.17756 |

Totals : 2.35583e4 686.85547

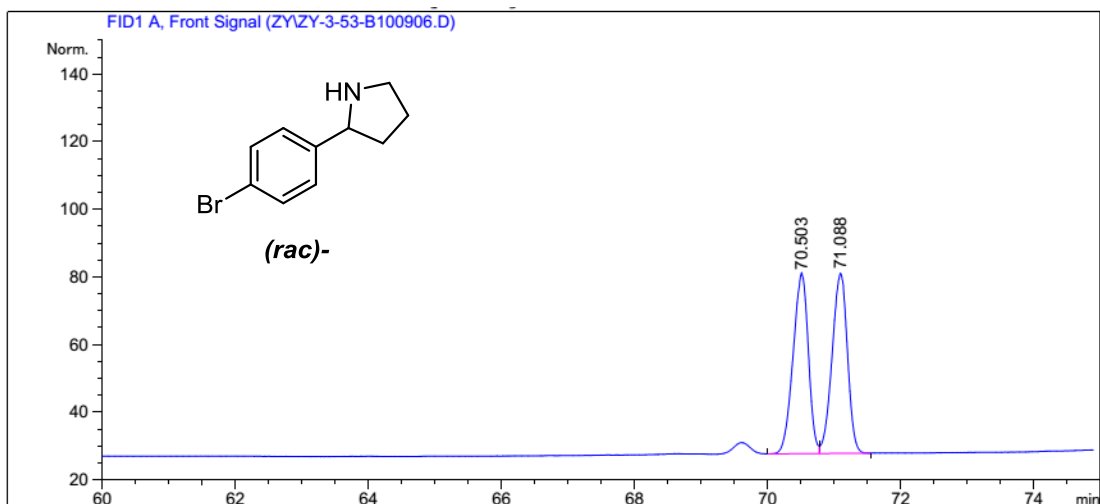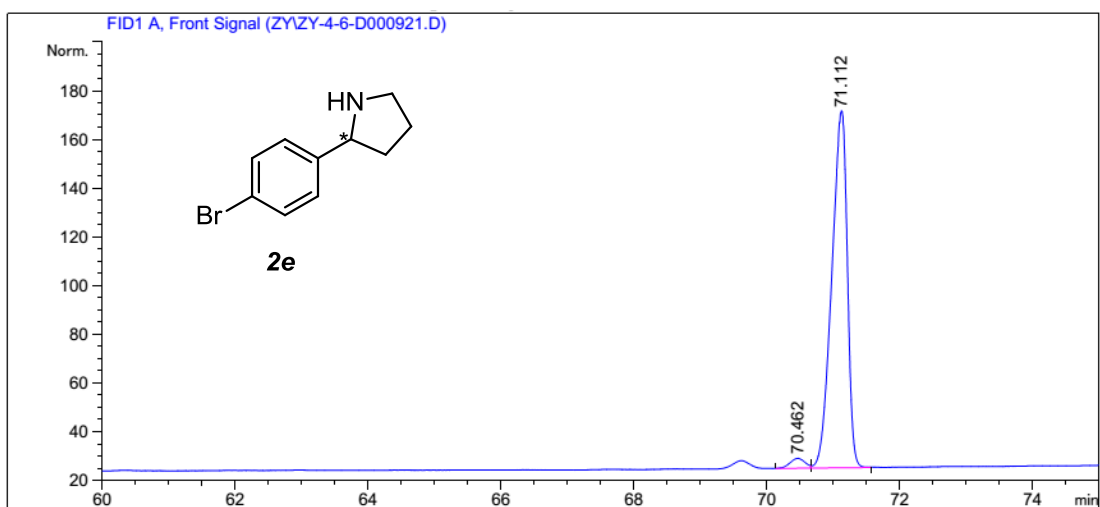

| Peak # | RetTime [min] | Type | Width [min] | Area [pA*s] | Height [pA] | Area %   |
|--------|---------------|------|-------------|-------------|-------------|----------|
| 1      | 70.462        | BV   | 0.2519      | 62.37601    | 4.01001     | 2.55021  |
| 2      | 71.112        | VB   | 0.2545      | 2383.54321  | 146.01022   | 97.44979 |

Totals : 2445.91922 150.02024

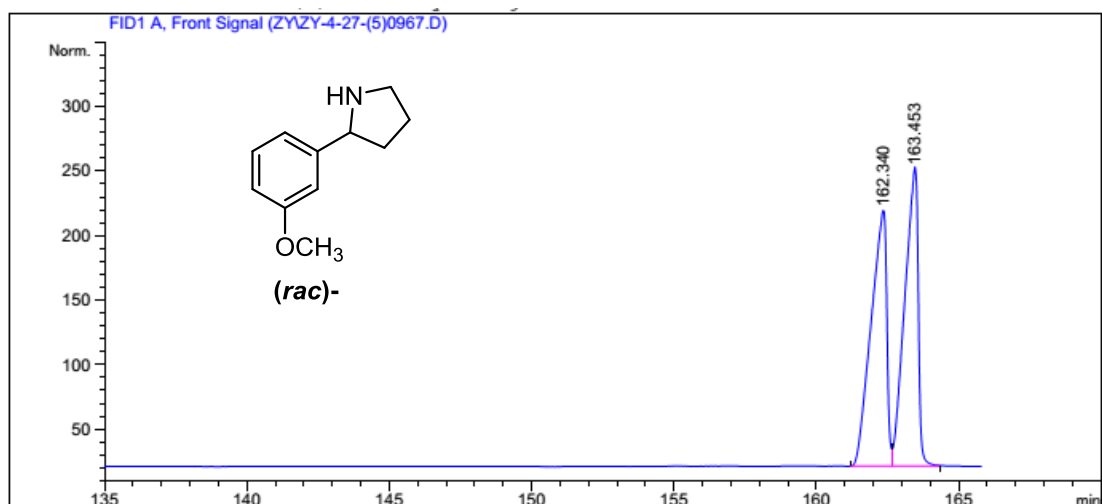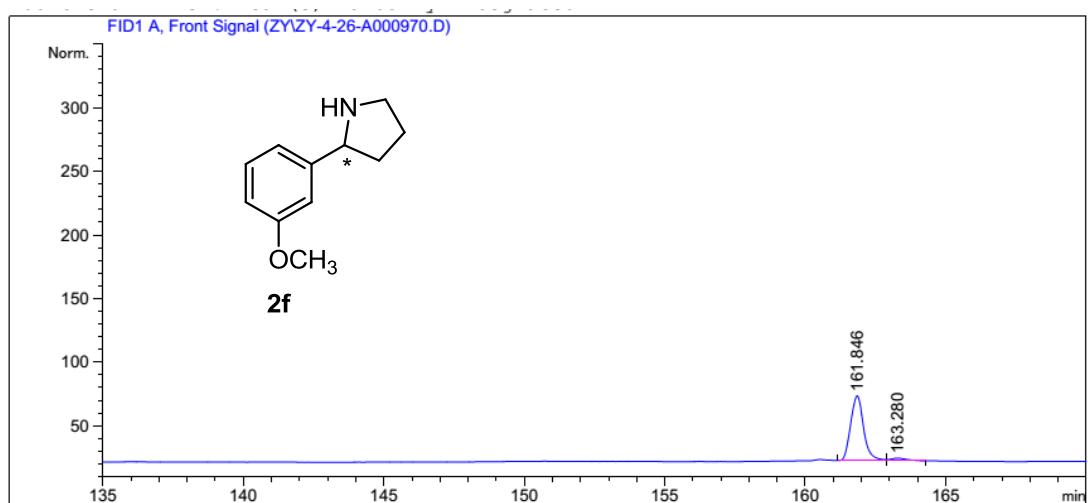

| Peak # | RetTime [min] | Type | Width [min] | Area [pA*s] | Height [pA] | Area %   |
|--------|---------------|------|-------------|-------------|-------------|----------|
| 1      | 161.846       | VV   | 0.5012      | 1664.63501  | 51.15775    | 94.82465 |
| 2      | 163.280       | VB   | 0.6293      | 90.85270    | 2.14183     | 5.17535  |

Totals : 1755.48771 53.29958

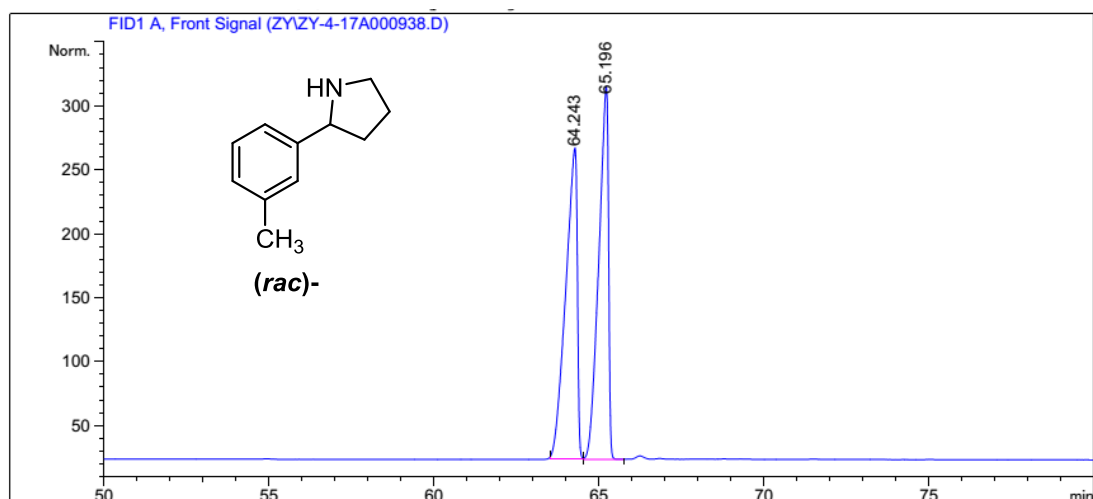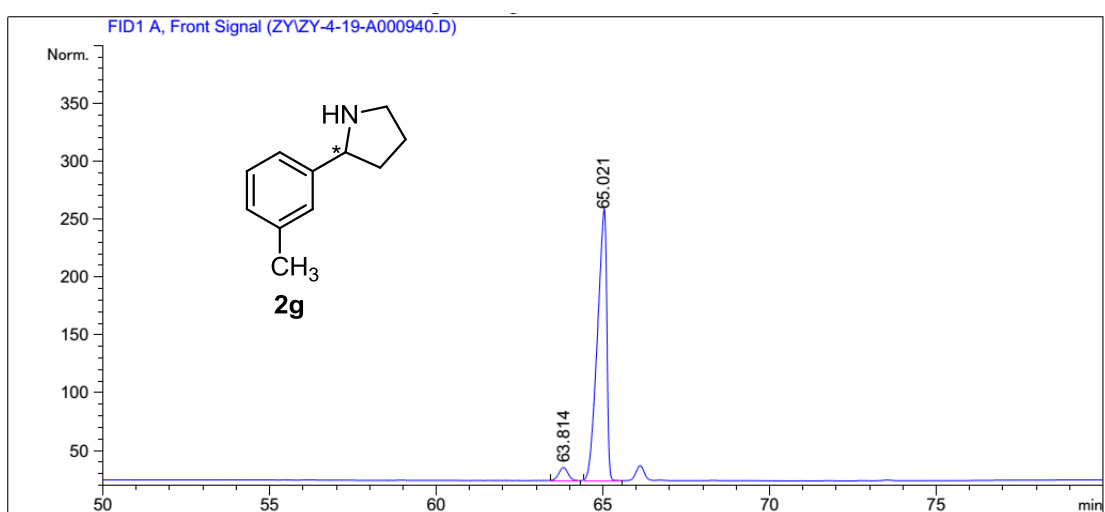

| Peak # | RetTime [min] | Type | Width [min] | Area [pA*s] | Height [pA] | Area %   |
|--------|---------------|------|-------------|-------------|-------------|----------|
| 1      | 63.814        | BB   | 0.3024      | 218.29448   | 11.28777    | 4.56620  |
| 2      | 65.021        | BB   | 0.3081      | 4562.36182  | 230.15836   | 95.43380 |

Totals : 4780.65630 241.44612

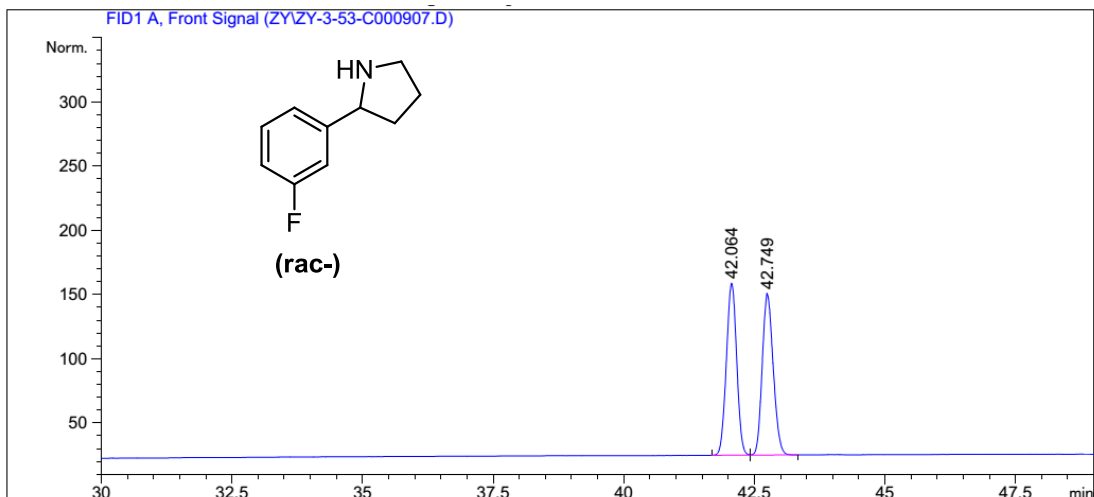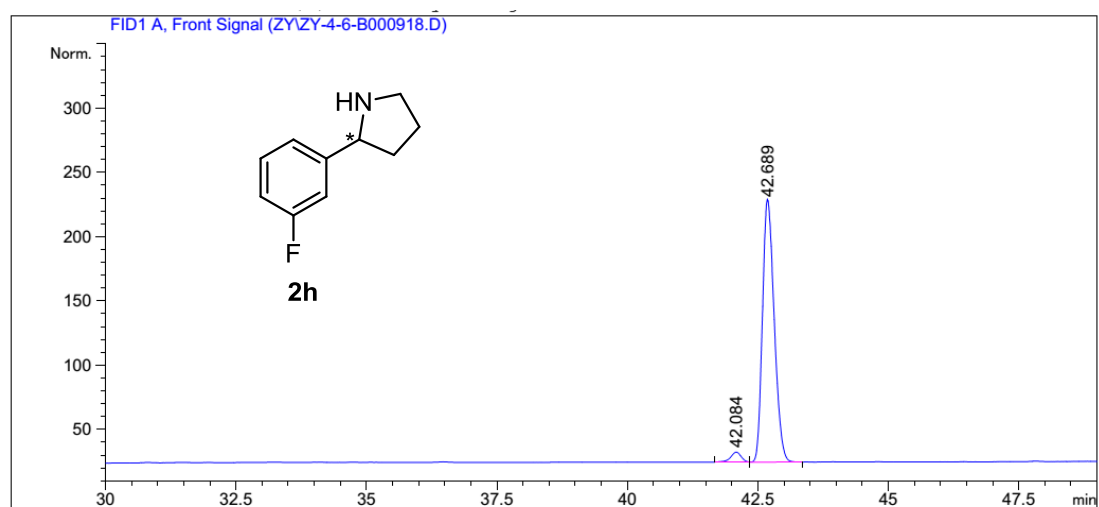

| Peak # | RetTime [min] | Type | Width [min] | Area [pA*s] | Height [pA] | Area %   |
|--------|---------------|------|-------------|-------------|-------------|----------|
| 1      | 42.084        | BV   | 0.2230      | 109.14978   | 7.69908     | 3.30340  |
| 2      | 42.689        | VB   | 0.2483      | 3195.01489  | 202.27066   | 96.69660 |

Totals : 3304.16467 209.96974

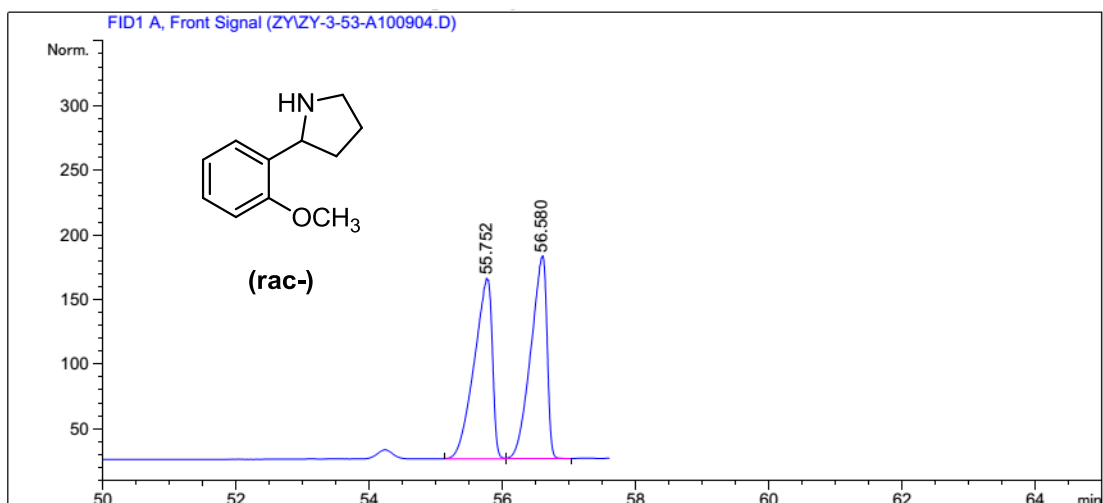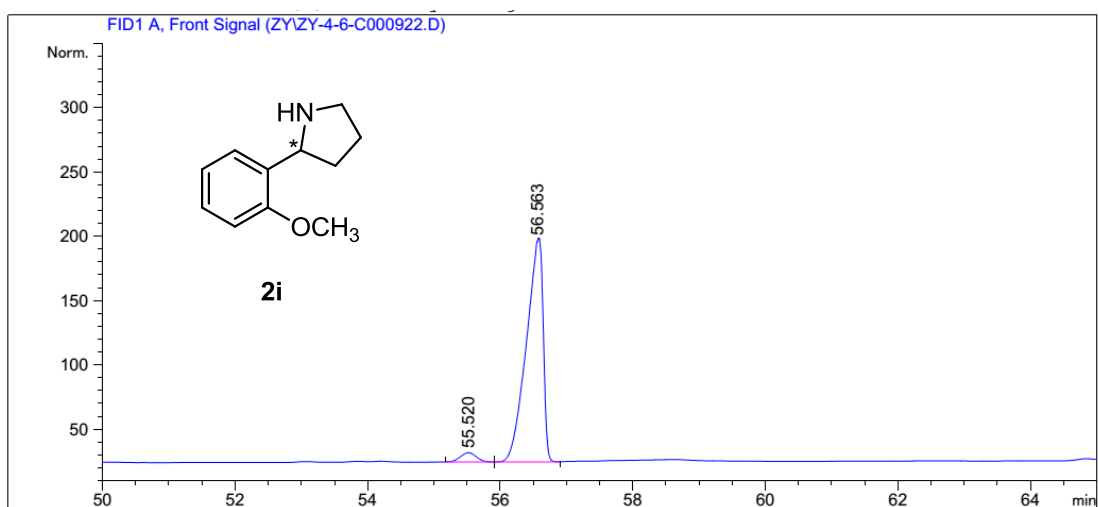

| Peak # | RetTime [min] | Type | Width [min] | Area [pA*s] | Height [pA] | Area %   |
|--------|---------------|------|-------------|-------------|-------------|----------|
| 1      | 55.520        | BV   | 0.2674      | 122.68687   | 7.26564     | 3.85677  |
| 2      | 56.563        | VV   | 0.2708      | 3058.39502  | 172.55530   | 96.14323 |

Totals : 3181.08189 179.82094

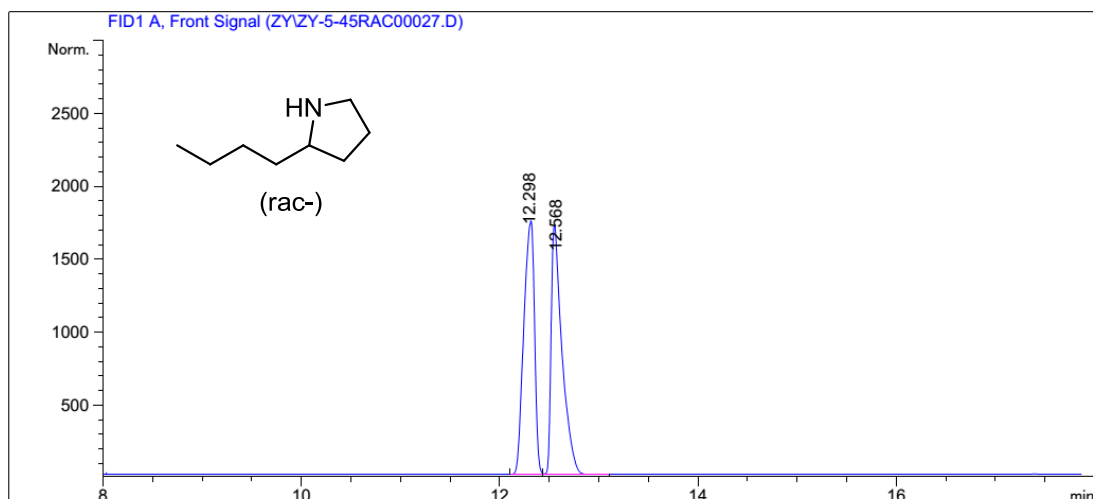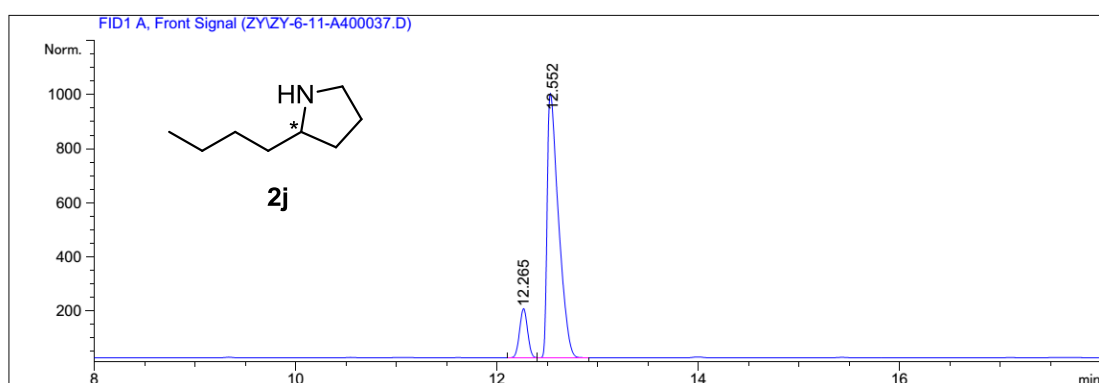

| Peak # | RetTime [min] | Type | Width [min] | Area [pA*s] | Height [pA] | Area %   |
|--------|---------------|------|-------------|-------------|-------------|----------|
| 1      | 12.265        | BV   | 0.0989      | 1007.93030  | 175.84201   | 11.64395 |
| 2      | 12.552        | VB   | 0.1310      | 7648.32813  | 901.60046   | 88.35605 |

Totals : 8656.25842 1077.44247

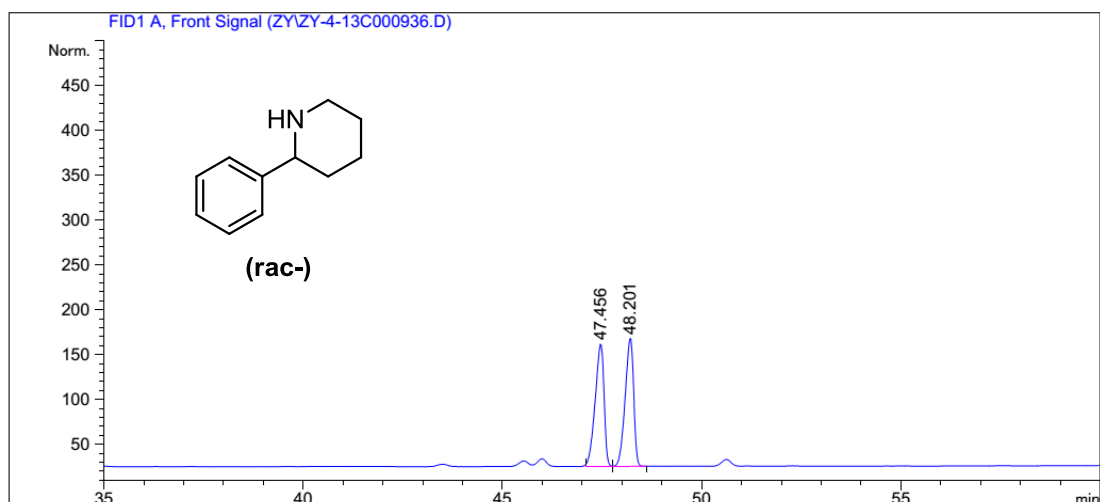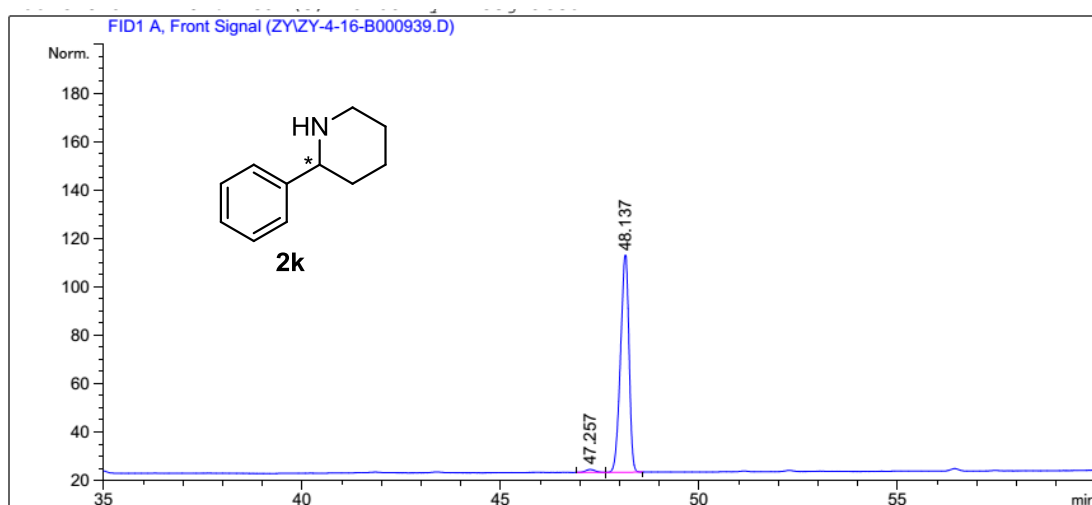

| Peak # | RetTime [min] | Type | Width [min] | Area [pA*s] | Height [pA] | Area %   |
|--------|---------------|------|-------------|-------------|-------------|----------|
| 1      | 47.257        | BV   | 0.2662      | 20.21844    | 1.20470     | 1.48139  |
| 2      | 48.137        | VB   | 0.2396      | 1344.60938  | 89.33911    | 98.51861 |

Totals : 1364.82782 90.54381



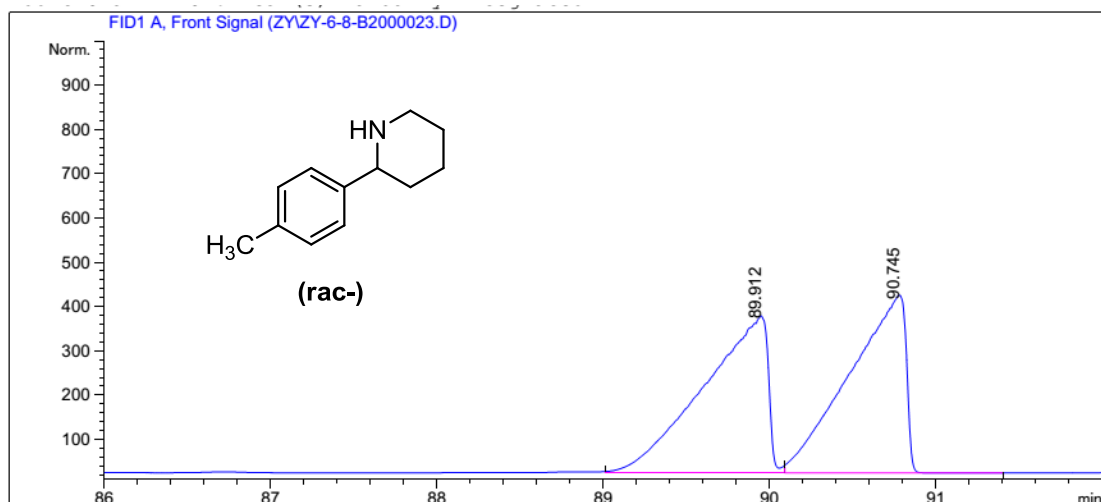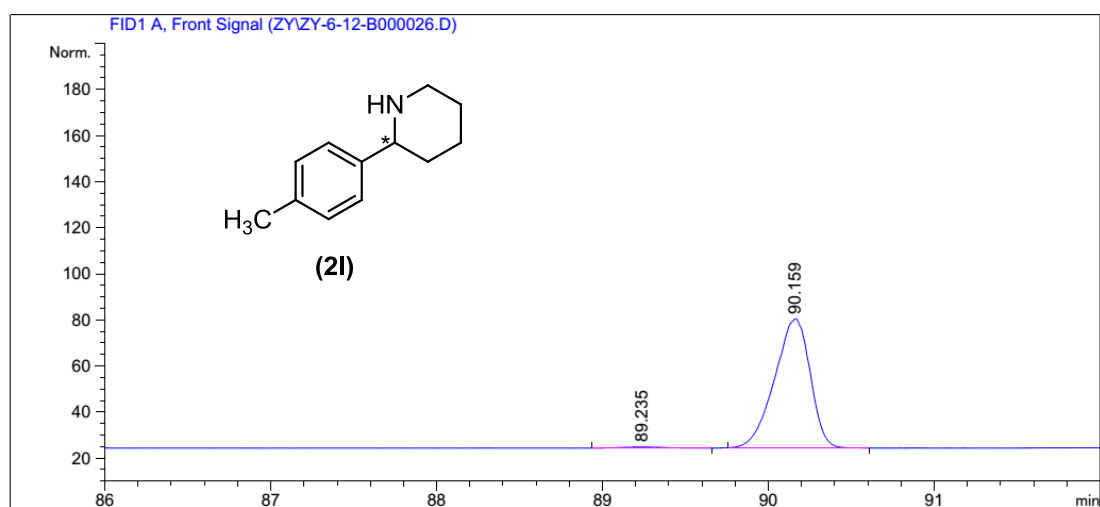

| Peak # | RetTime [min] | Type | Width [min] | Area [pA*s] | Height [pA] | Area %   |
|--------|---------------|------|-------------|-------------|-------------|----------|
| 1      | 89.235        | BB   | 0.2429      | 7.63692     | 4.80824e-1  | 0.90386  |
| 2      | 90.159        | BB   | 0.2290      | 837.28369   | 55.93124    | 99.09614 |

Totals : 844.92061 56.41206

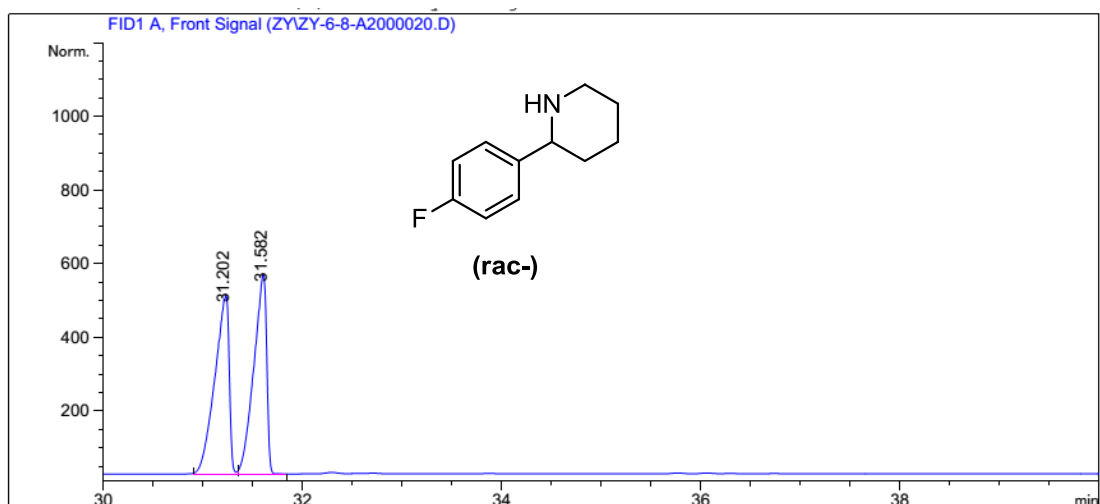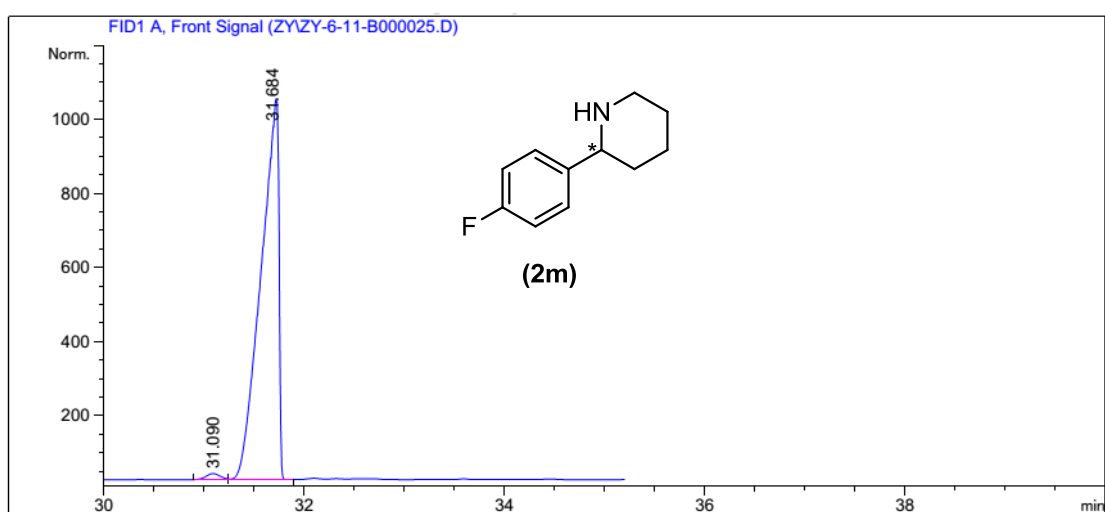

| Peak # | RetTime [min] | Type | Width [min] | Area [pA*s] | Height [pA] | Area %   |
|--------|---------------|------|-------------|-------------|-------------|----------|
| 1      | 31.090        | BV   | 0.1604      | 165.04778   | 16.66411    | 1.28209  |
| 2      | 31.684        | VV   | 0.1871      | 1.27083e4   | 955.83893   | 98.71791 |

Totals : 1.28733e4 972.50303

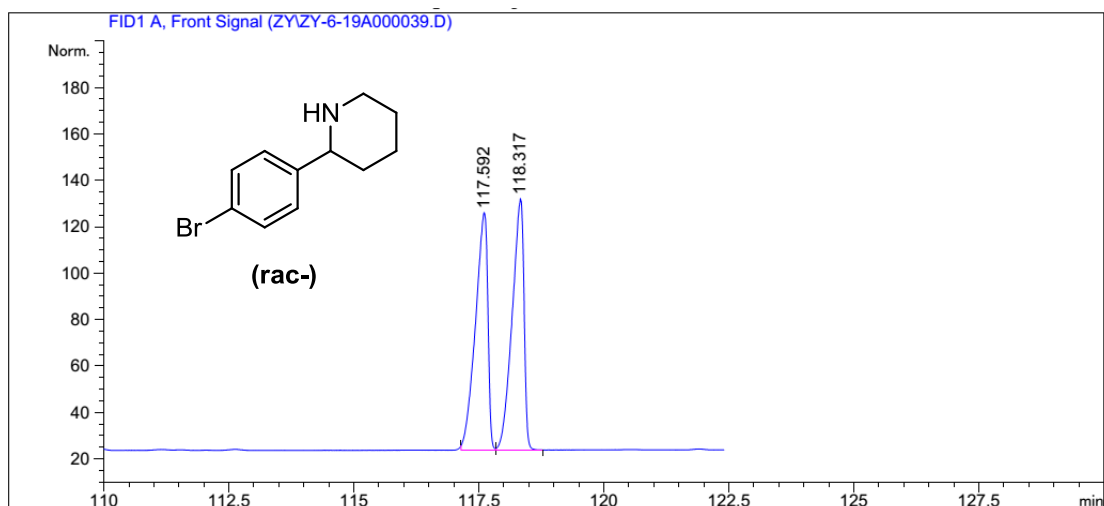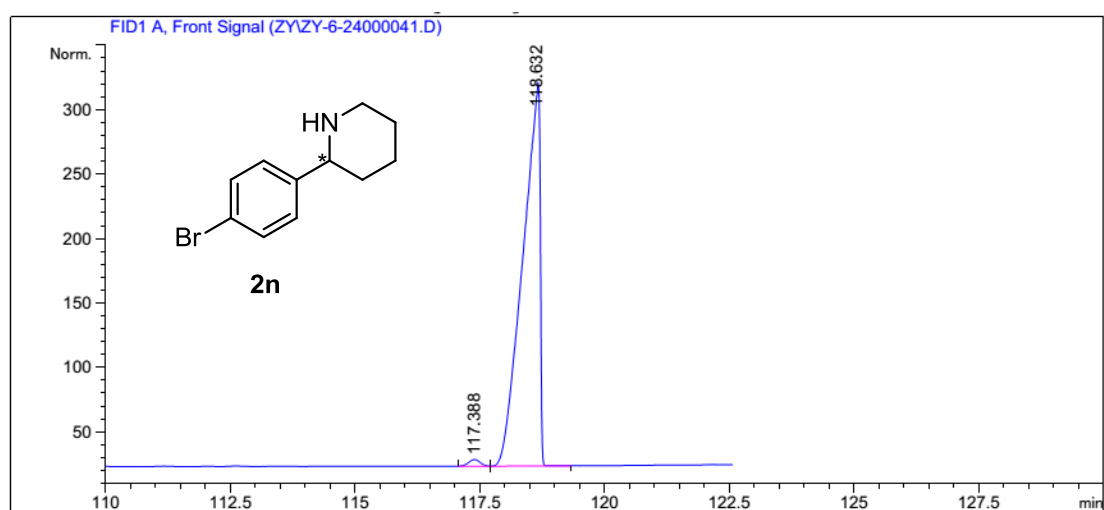

| Peak # | RetTime [min] | Type | Width [min] | Area [pA*s] | Height [pA] | Area %   |
|--------|---------------|------|-------------|-------------|-------------|----------|
| 1      | 117.388       | BV   | 0.2574      | 83.12338    | 5.18460     | 1.14529  |
| 2      | 118.632       | VB   | 0.3666      | 7174.71338  | 282.58453   | 98.85471 |

Totals : 7257.83676 287.76913

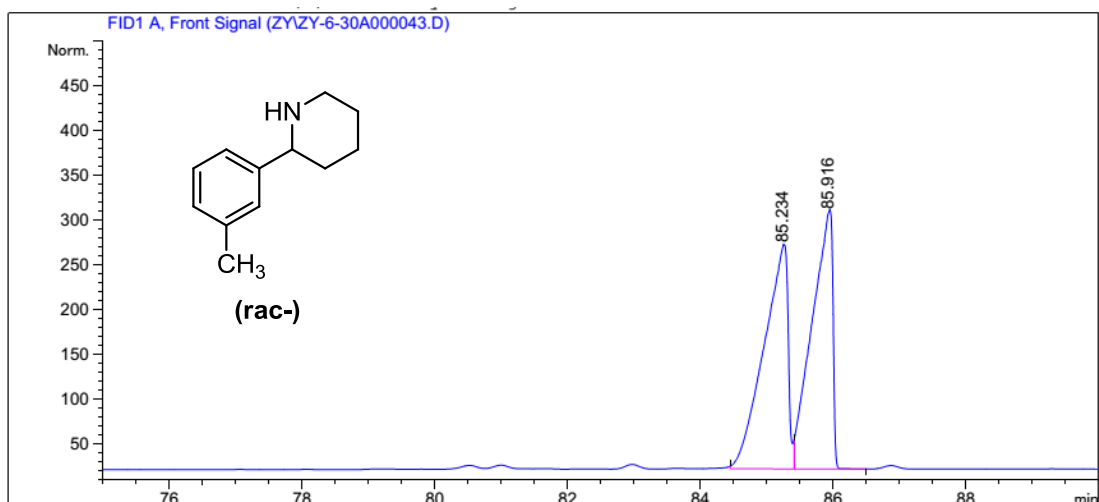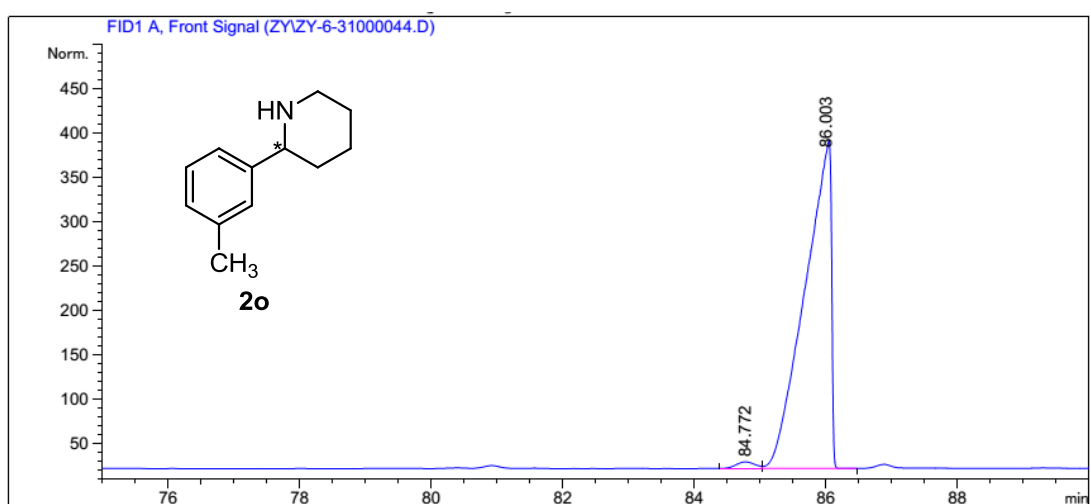

| Peak # | RetTime [min] | Type | Width [min] | Area [pA*s] | Height [pA] | Area %   |
|--------|---------------|------|-------------|-------------|-------------|----------|
| 1      | 84.772        | BV   | 0.3157      | 149.62167   | 7.50662     | 1.43135  |
| 2      | 86.003        | VV   | 0.3882      | 1.03035e4   | 356.68768   | 98.56865 |

Totals : 1.04532e4 364.19430

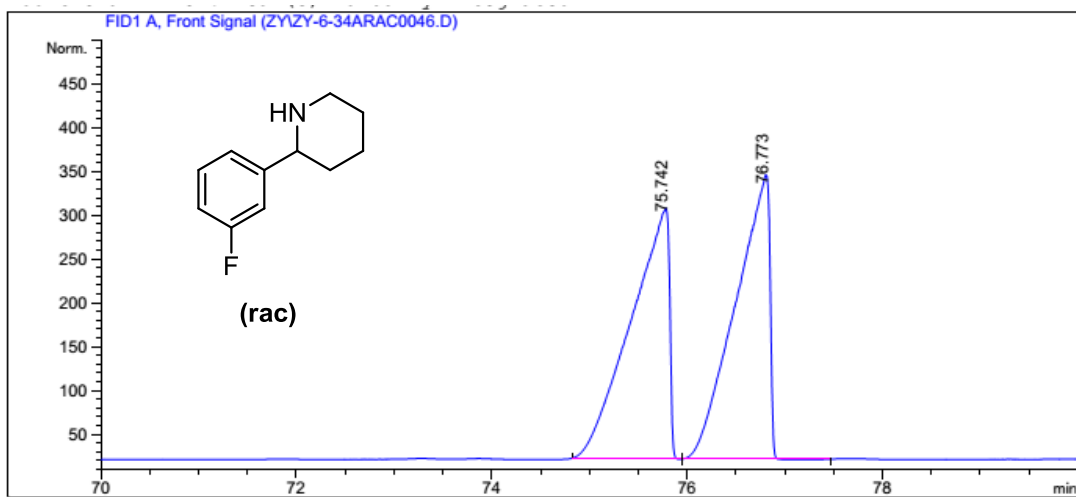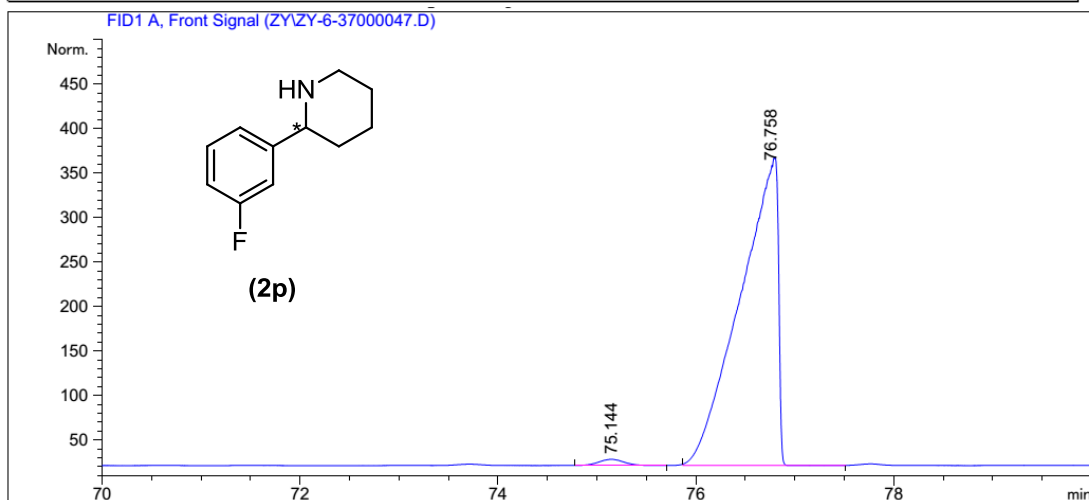

| Peak # | RetTime [min] | Type | Width [min] | Area [pA*s] | Height [pA] | Area %   |
|--------|---------------|------|-------------|-------------|-------------|----------|
| 1      | 75.144        | BB   | 0.2765      | 123.00890   | 6.96321     | 1.31492  |
| 2      | 76.758        | BB   | 0.3766      | 9231.88281  | 337.68585   | 98.68508 |

Totals : 9354.89172 344.64906

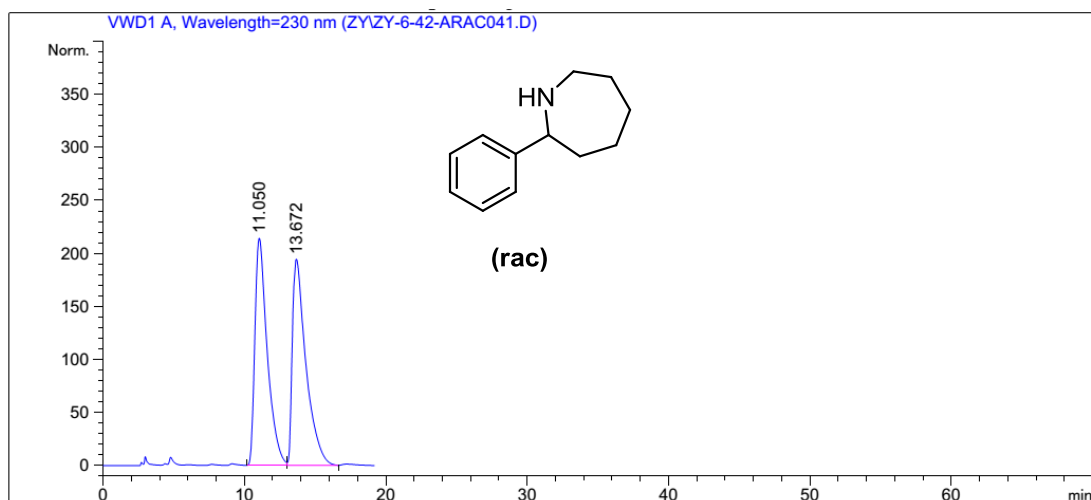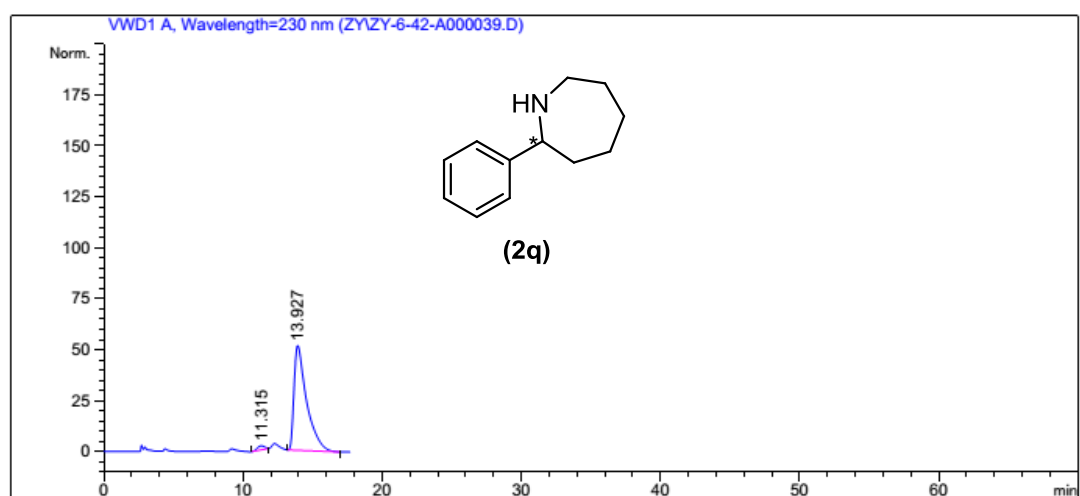

| Peak # | RetTime [min] | Type | Width [min] | Area [mAU*s] | Height [mAU] | Area %  |
|--------|---------------|------|-------------|--------------|--------------|---------|
| 1      | 11.315        | BB   | 0.5802      | 73.49934     | 1.97506      | 2.2229  |
| 2      | 13.927        | BB   | 0.9063      | 3232.98877   | 51.36491     | 97.7771 |

Totals : 3306.48811 53.33997

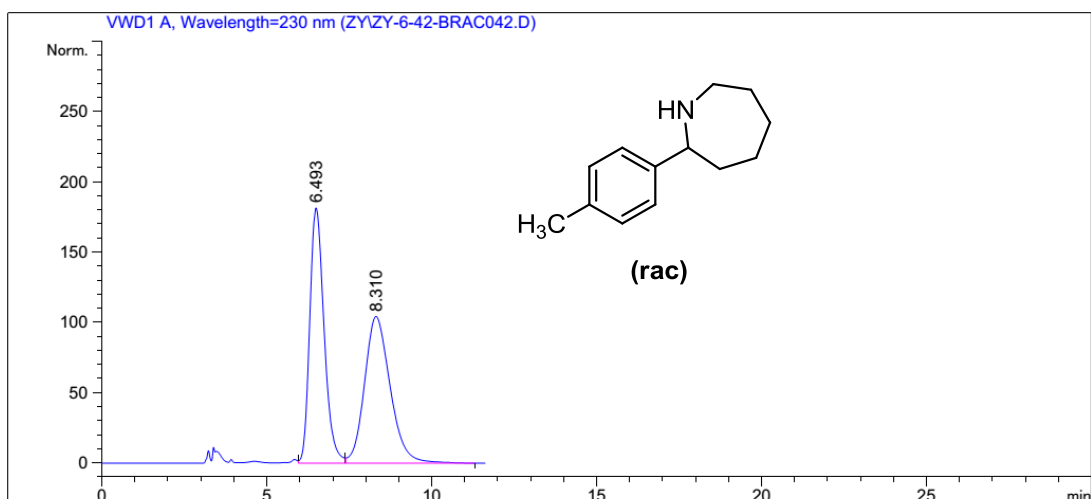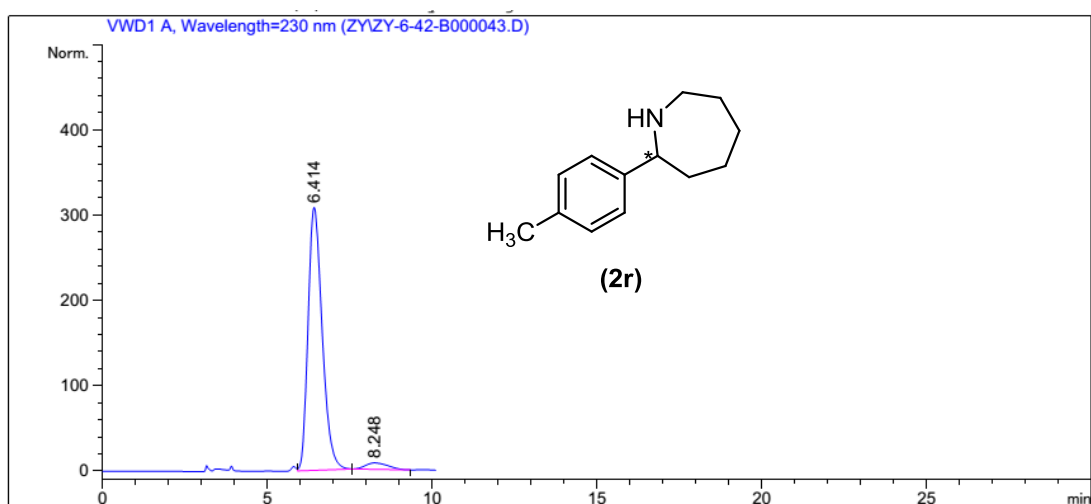

| Peak # | RetTime [min] | Type | Width [min] | Area [mAU*s] | Height [mAU] | Area %  |
|--------|---------------|------|-------------|--------------|--------------|---------|
| 1      | 6.414         | VB   | 0.4601      | 9164.89551   | 308.04874    | 96.2797 |
| 2      | 8.248         | BB   | 0.7642      | 354.13666    | 7.50940      | 3.7203  |

Totals : 9519.03217 315.55813

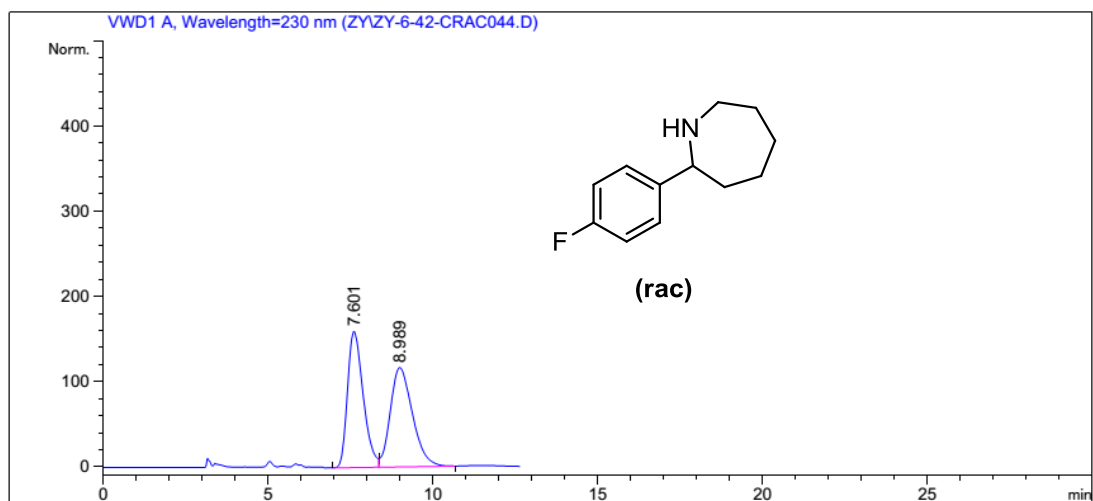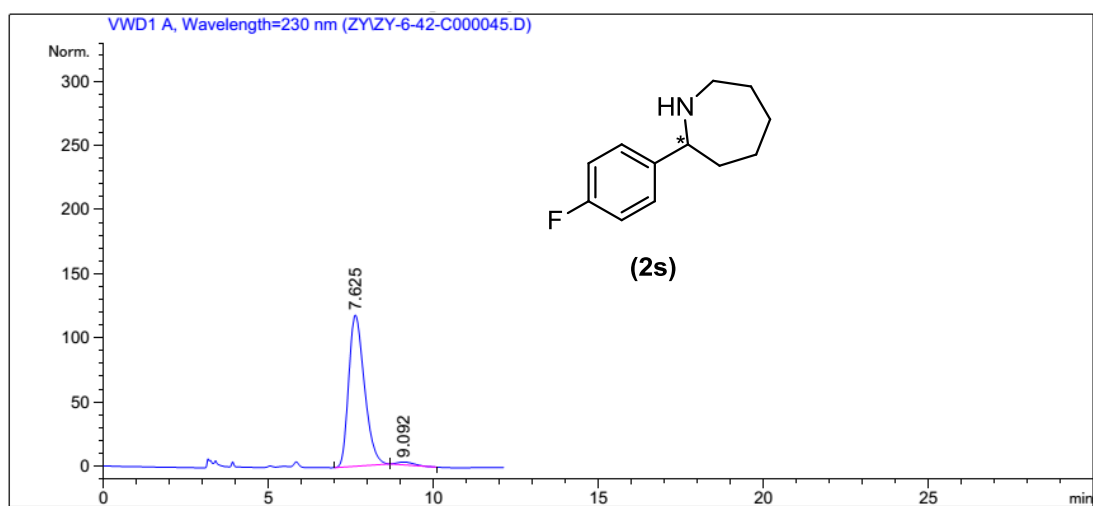

| Peak # | RetTime [min] | Type | Width [min] | Area [mAU*s] | Height [mAU] | Area %  |
|--------|---------------|------|-------------|--------------|--------------|---------|
| 1      | 7.625         | BB   | 0.5107      | 3896.52197   | 117.87038    | 98.0532 |
| 2      | 9.092         | BB   | 0.5460      | 77.36295     | 2.20659      | 1.9468  |

Totals : 3973.88492 120.07697



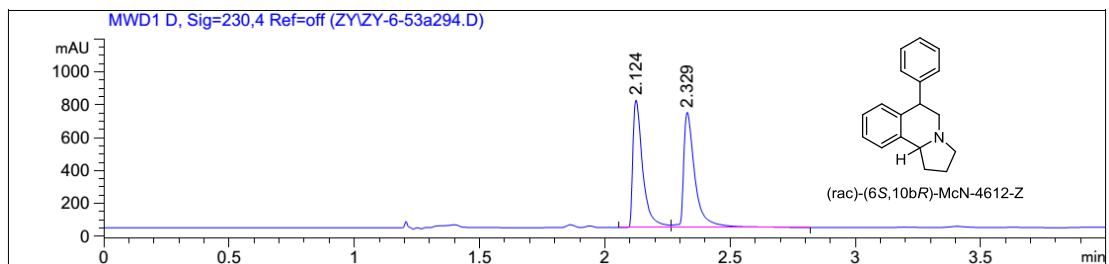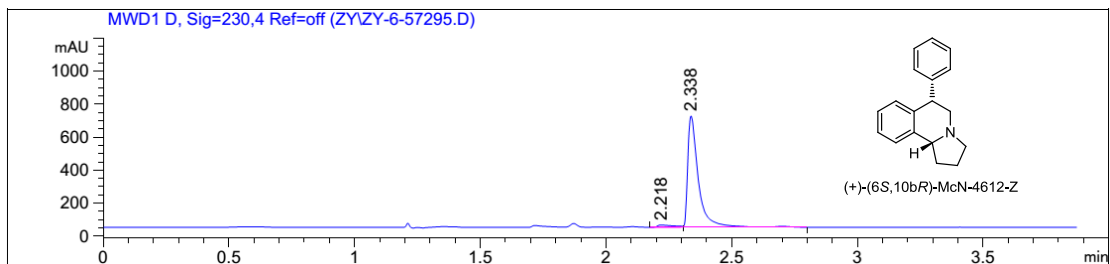

| Peak # | RetTime [min] | Type | Width [min] | Area [mAU*s] | Height [mAU] | Area %  |
|--------|---------------|------|-------------|--------------|--------------|---------|
| 1      | 2.216         | BV E | 0.0472      | 9.25935      | 2.72132      | 2.4214  |
| 2      | 2.338         | VV R | 0.0398      | 373.13544    | 139.11365    | 97.5786 |

Totals : 382.39479 141.83497
